# Supplementary material for: Synthesis, characterization, and biological applications of zinc(ii) complexes of the methylthiosalicylate ligand
Source: Royal Society of Chemistry journal article supplement (doi:10.1039/d4nj03927k), 2024-01-01
Supplement: d4nj03927k1.pdf [file d4nj03927k1.pdf]

## Supporting Information

### Synthesis, Characterization, and Biological Applications of Zinc(II)

#### Complexes of Methylthiosalicylate Ligand

*Rajesh Pratap*<sup>a</sup>, *Soni Kumari*,<sup>b</sup> *Nishtha chaturvedi*<sup>a</sup>, *Rajnikant Mishra*<sup>b\*</sup>,

*Subrato Bhattacharya*<sup>a\*</sup>

<sup>a</sup>Department of Chemistry, Institute of Science, Banaras Hindu University, Varanasi-221005,

<sup>b</sup>Biochemistry and Molecular Biology Laboratory, Department of Zoology, Institute of  
Science, Banaras Hindu University, Varanasi-221005, India

Email (SB): [s\\_bhatt@bhu.ac.in](mailto:s_bhatt@bhu.ac.in)

|                        | <b>Contents</b>                                                                                   | <b>Page No.</b> |
|------------------------|---------------------------------------------------------------------------------------------------|-----------------|
| <b>Figures S1-S8</b>   | NMR spectra of synthesized Zn complexes                                                           | <b>2-6</b>      |
| <b>Figures S9-S12</b>  | Time dependent <sup>1</sup> H-NMR spectra of Zn complexes                                         | <b>6-7</b>      |
| <b>Figures S13-S20</b> | Solid and solution IR spectra of Zn complexes                                                     | <b>8-11</b>     |
| <b>Figures S21-S24</b> | Packing diagrams of Zn complexes                                                                  | <b>12-13</b>    |
| <b>Tables S1-S4</b>    | Calculated (DFT) and Experimental (Single Crystal X-ray Diffraction) Bond Lengths and Bond Angles | <b>14-17</b>    |
| <b>Tables S5-S6</b>    | Second Order Perturbation Theory Analysis for complex 2 & 3                                       | <b>18-19</b>    |
| <b>Fig. S25-S28</b>    | UV-Vis absorption spectra (Experimental and Calculated)                                           | <b>20-21</b>    |
| <b>Tables S7-S10</b>   | Molecular docking results of Complex 1-4                                                          | <b>22-30</b>    |

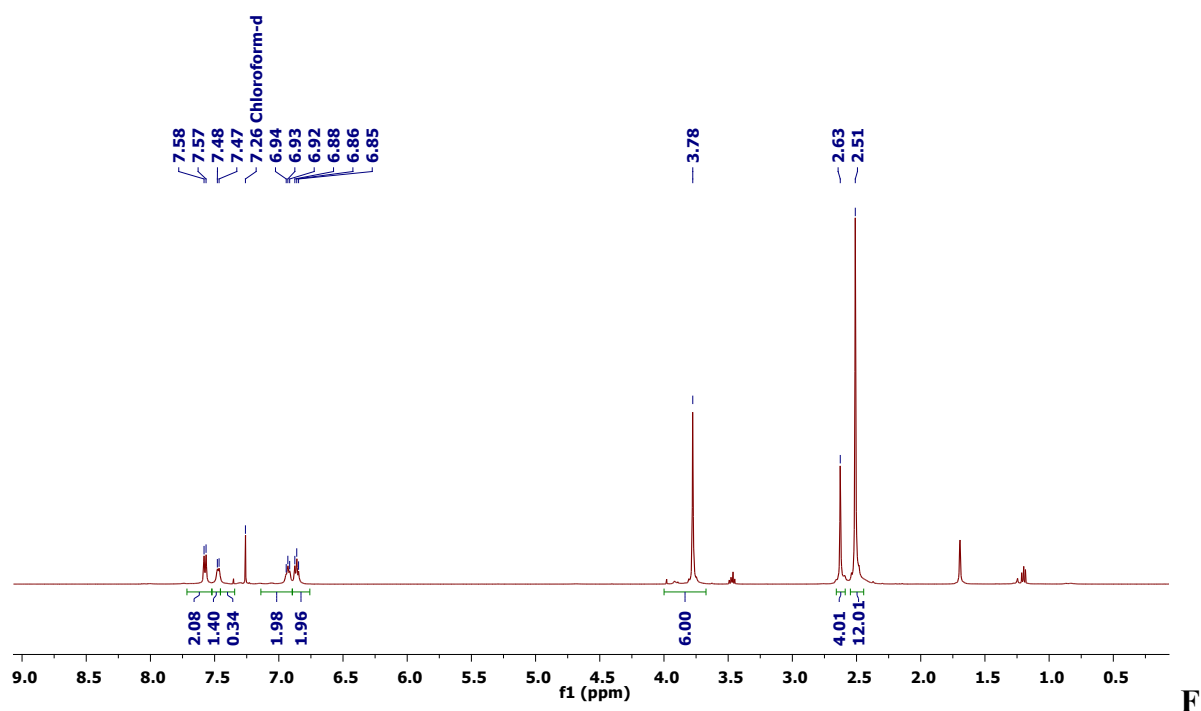

figure S1-  $^1\text{H}$  NMR spectrum of complex 1

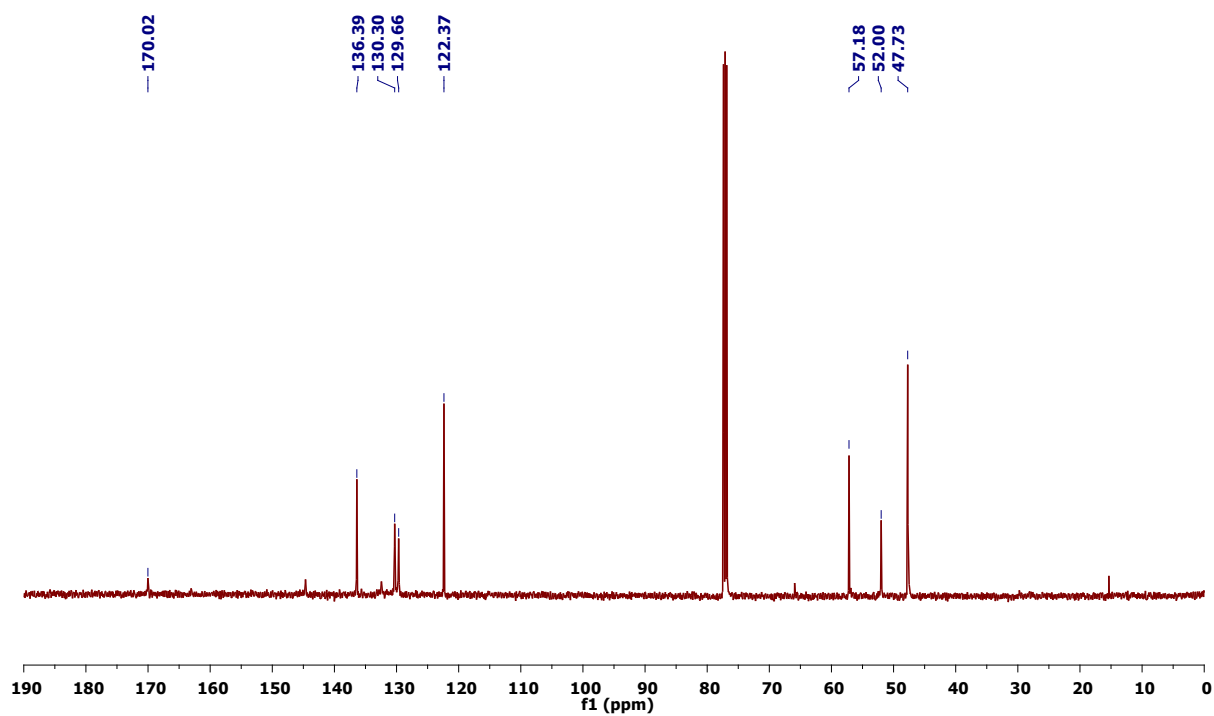

Figure S2 -  $^{13}\text{C}$  NMR spectrum of complex 1

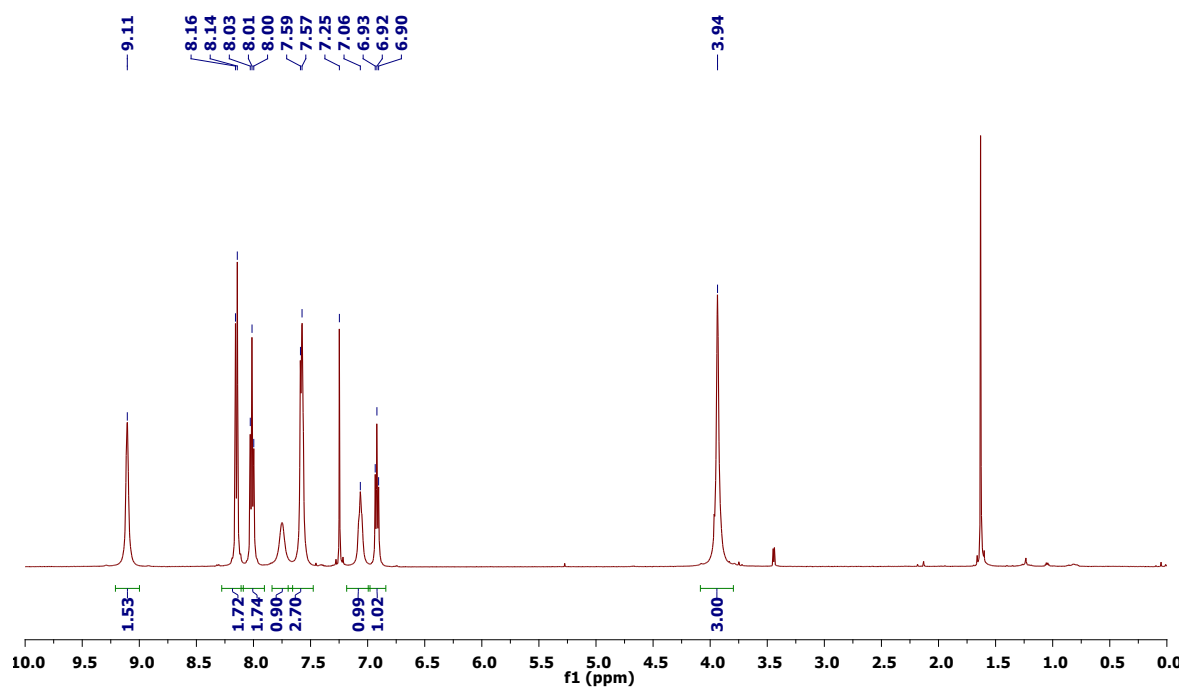

FigureS3 -  $^1\text{H}$  NMR spectrum of complex 2

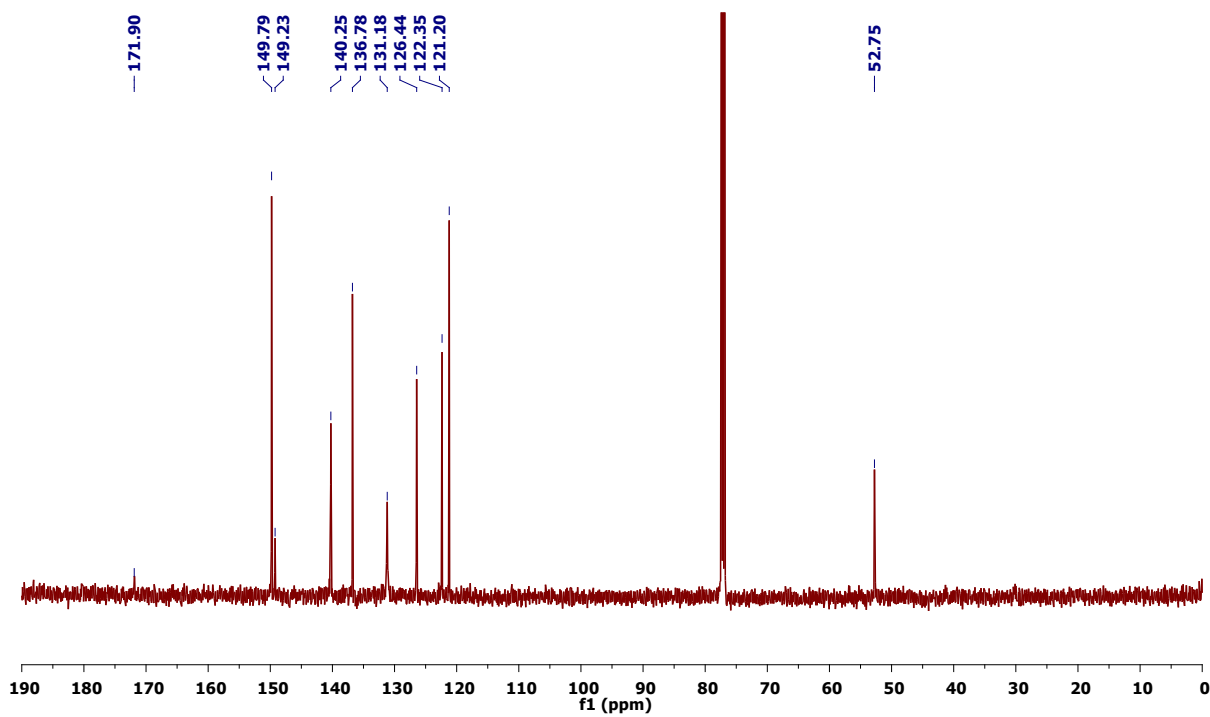

Figure S4  $^{13}\text{C}$  NMR spectrum of complex 2

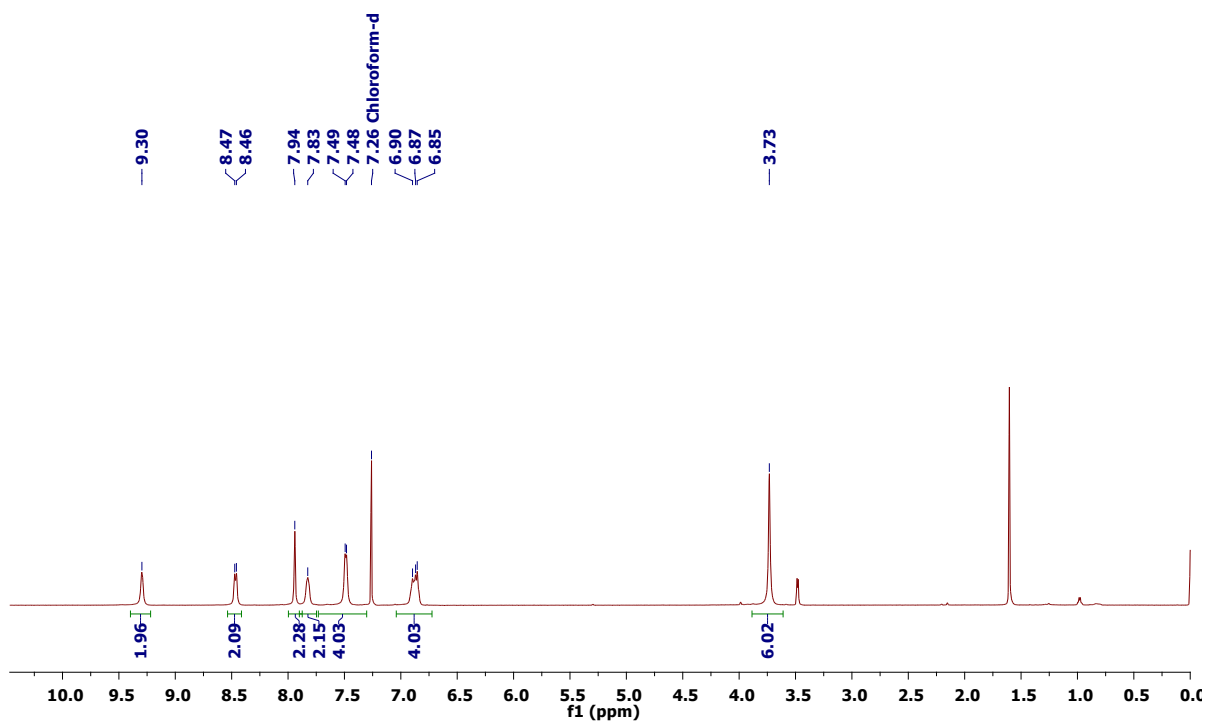

Figure S5-  $^1\text{H}$  NMR spectrum of complex 3

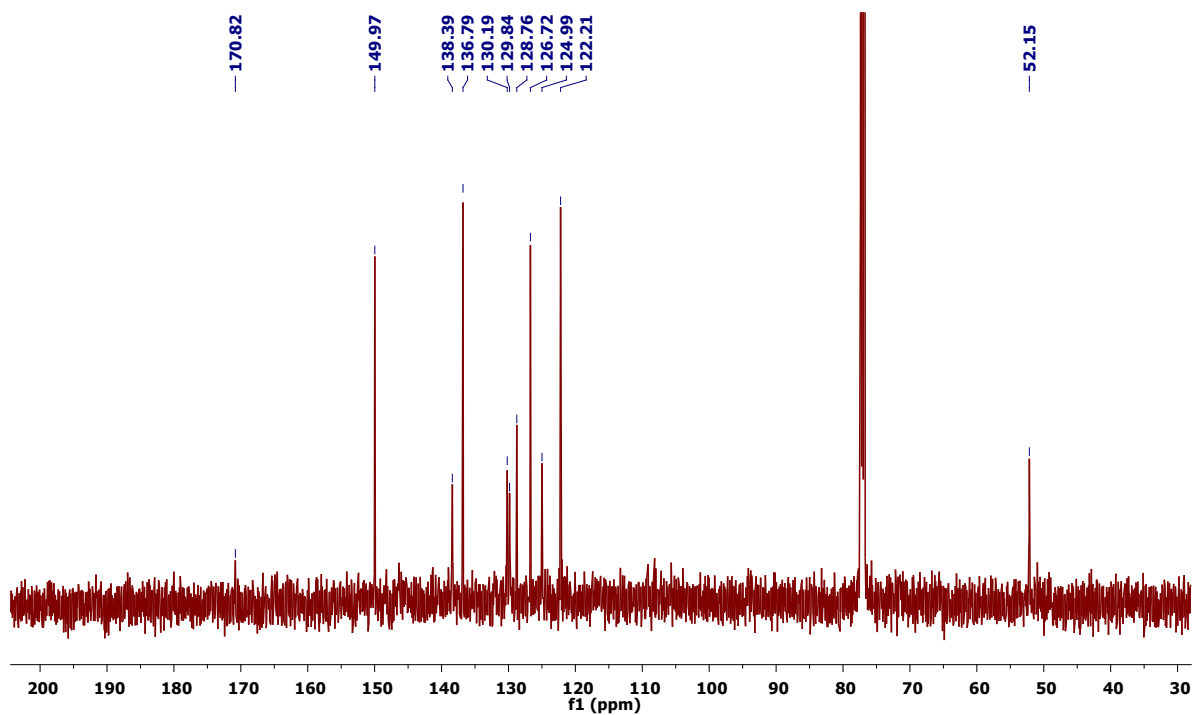

Figure S6-  $^{13}\text{C}$  NMR spectrum of Complex 3

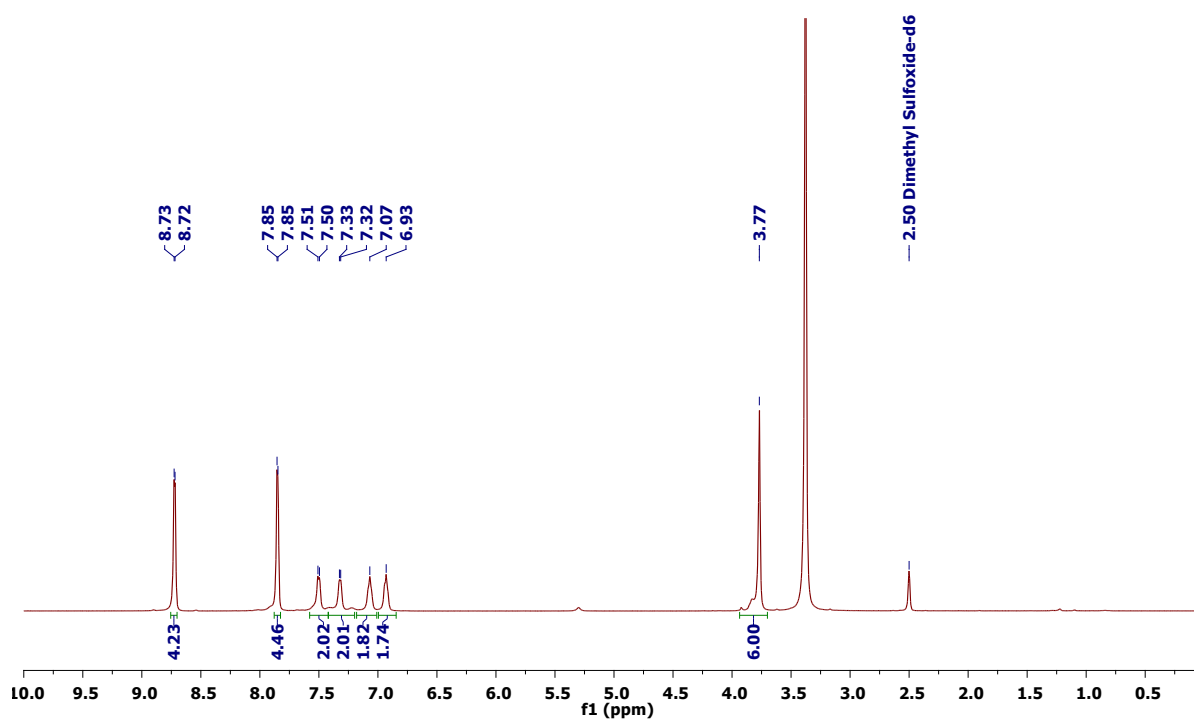

Figure S7 -  $^1\text{H}$  NMR spectrum of Complex 4

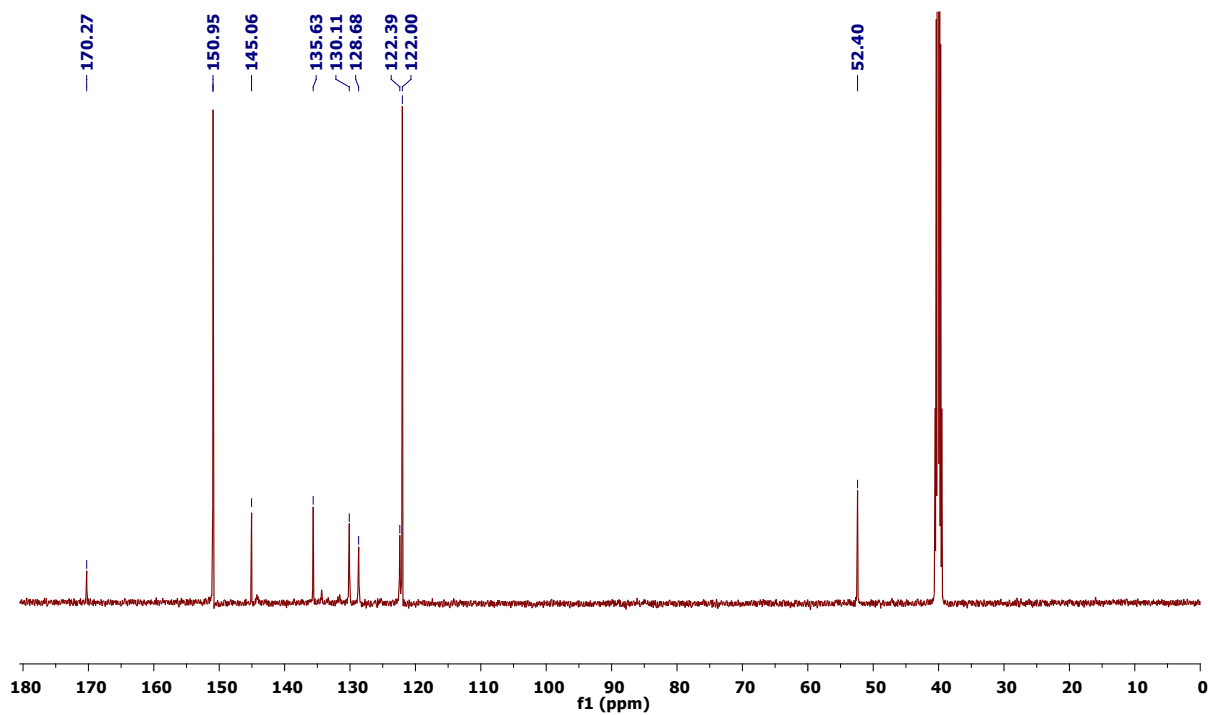

Figure S8-  $^{13}\text{C}$  NMR spectrum of Complex 4

## Time dependent $^1\text{H}$ -NMR spectrum

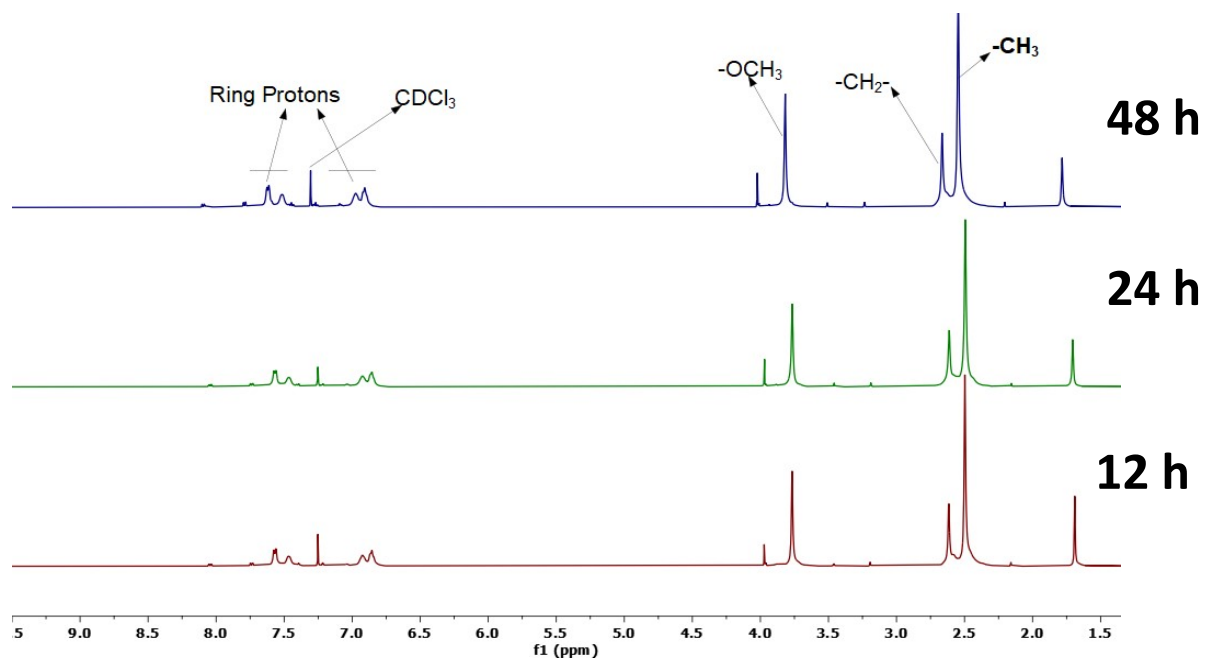

**Figure 9** -Time dependent  $^1\text{H}$  NMR spectra of Complex 1

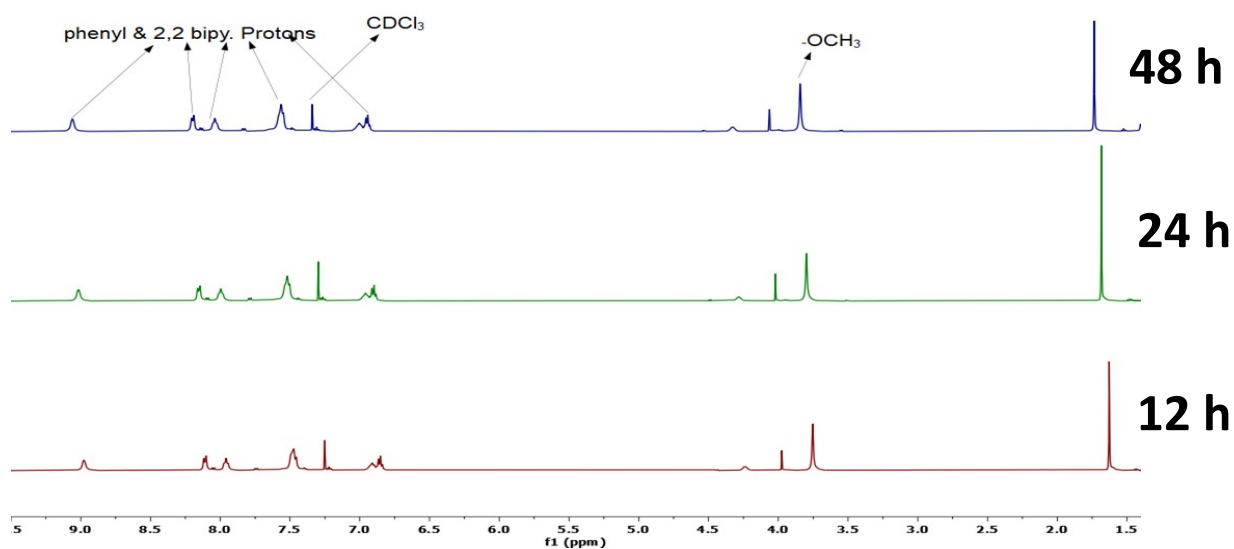

**Figure10**- Time dependent  $^1\text{H}$  NMR spectra of Complex 2

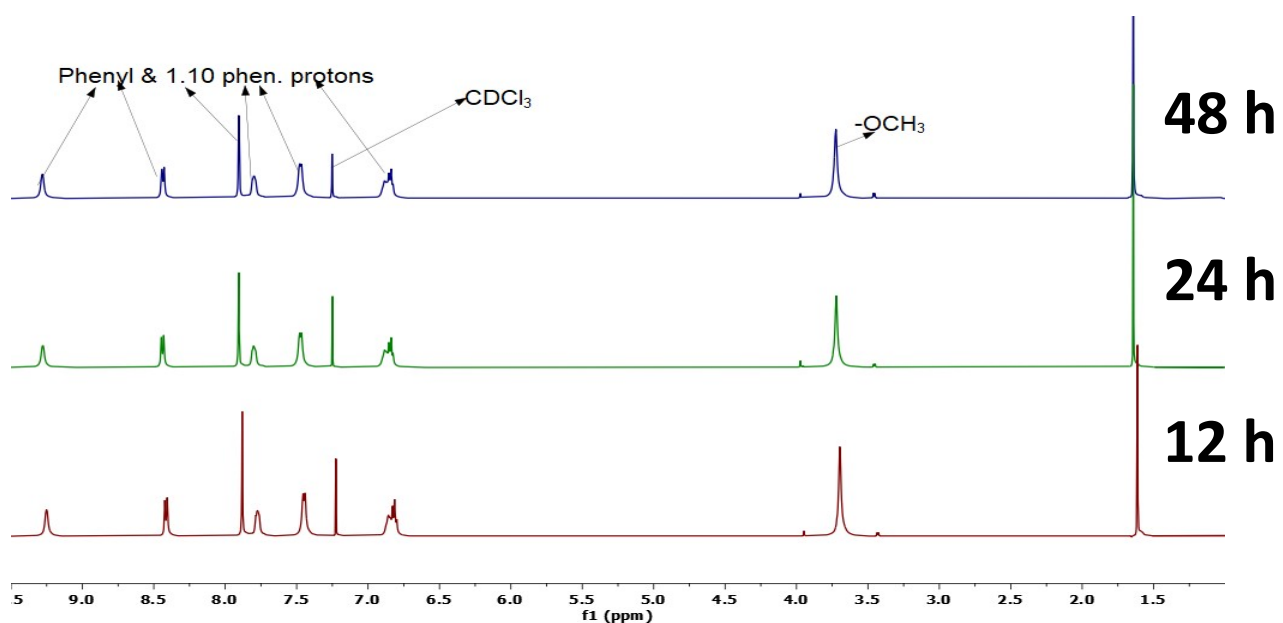

**Figure 11** Time dependent  $^1\text{H}$  NMR spectra of Complex 3

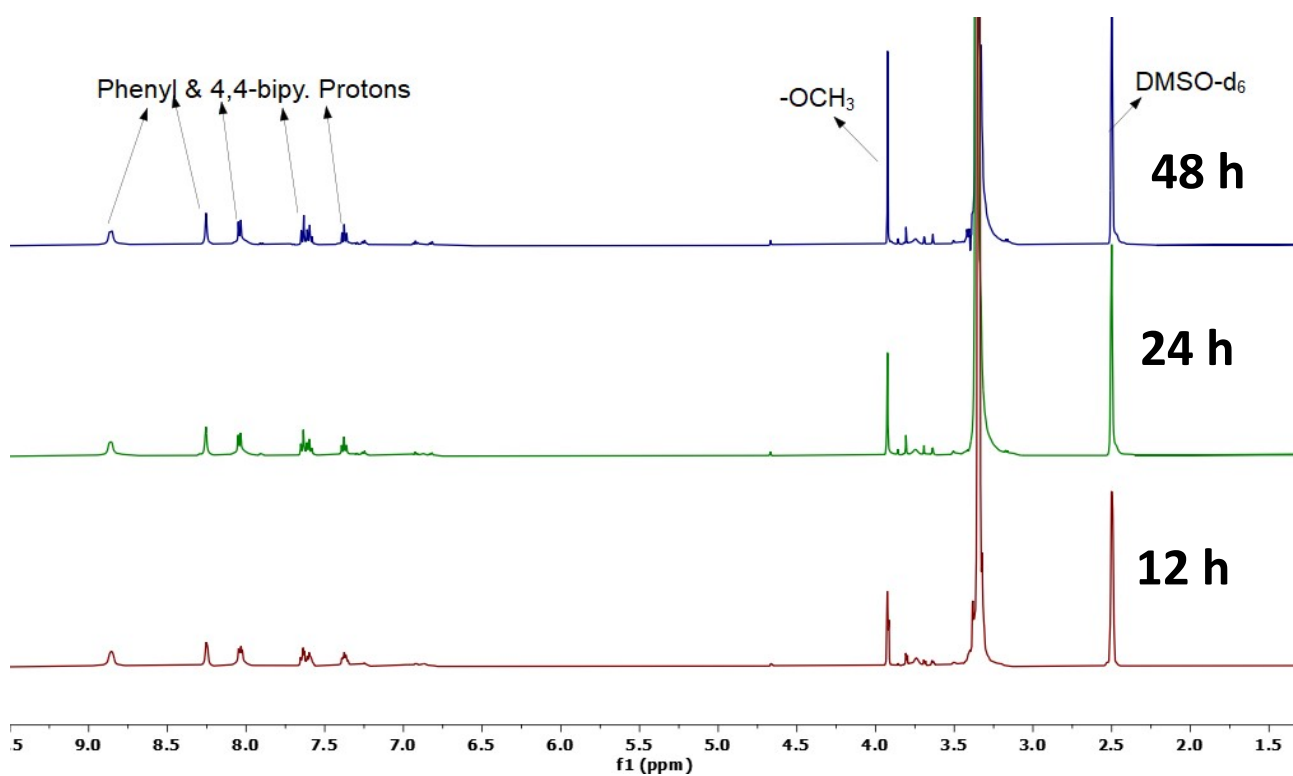

**Figure 12** Time dependent  $^1\text{H}$  NMR spectra of Complex 4

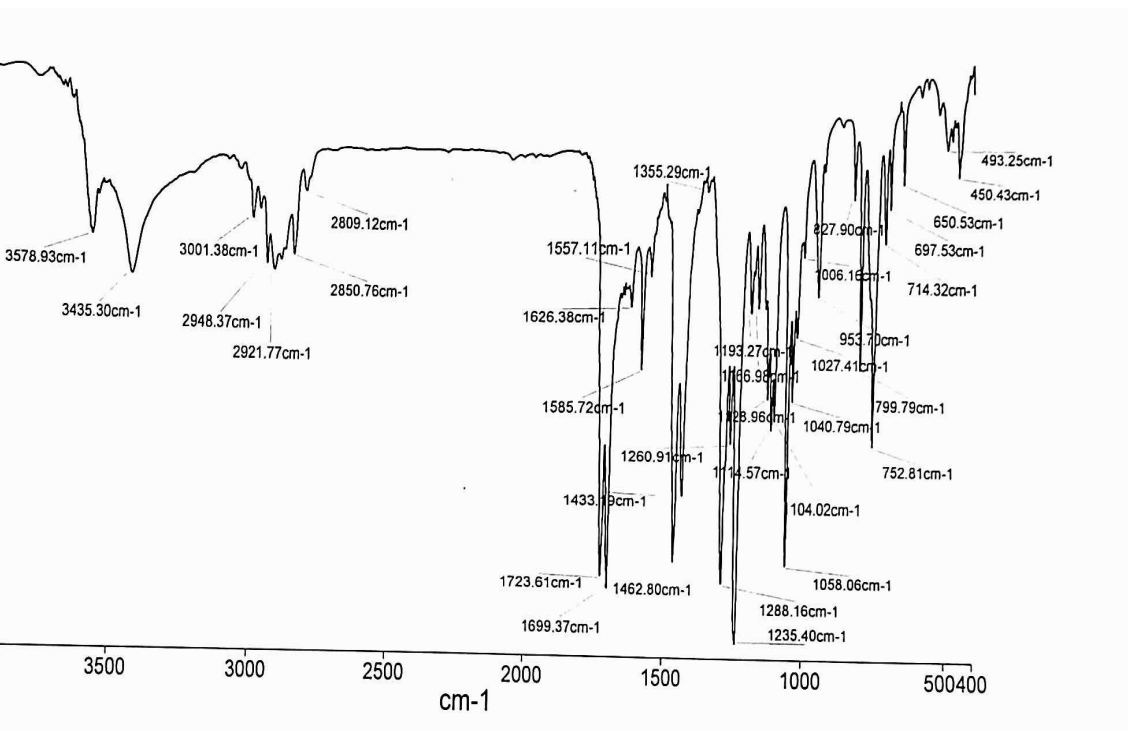

Figure S13. IR spectrum of Complex 1



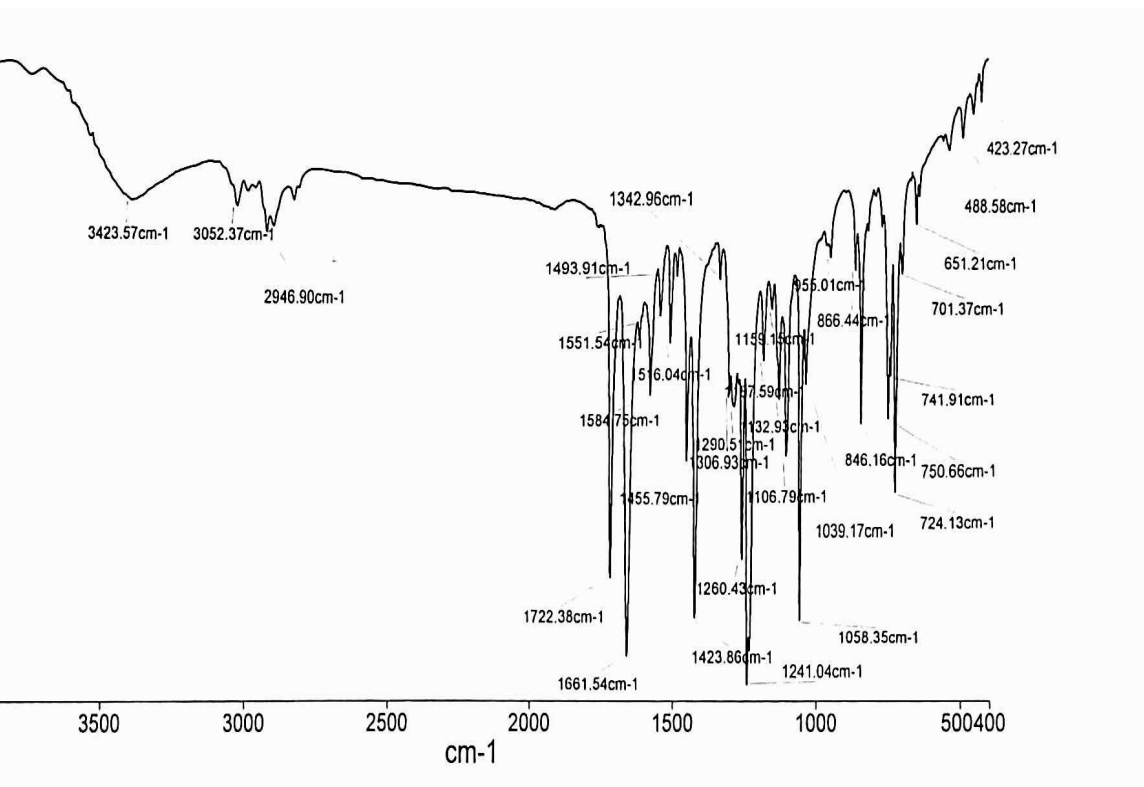

**Figure S14. IR spectrum of Complex 2**

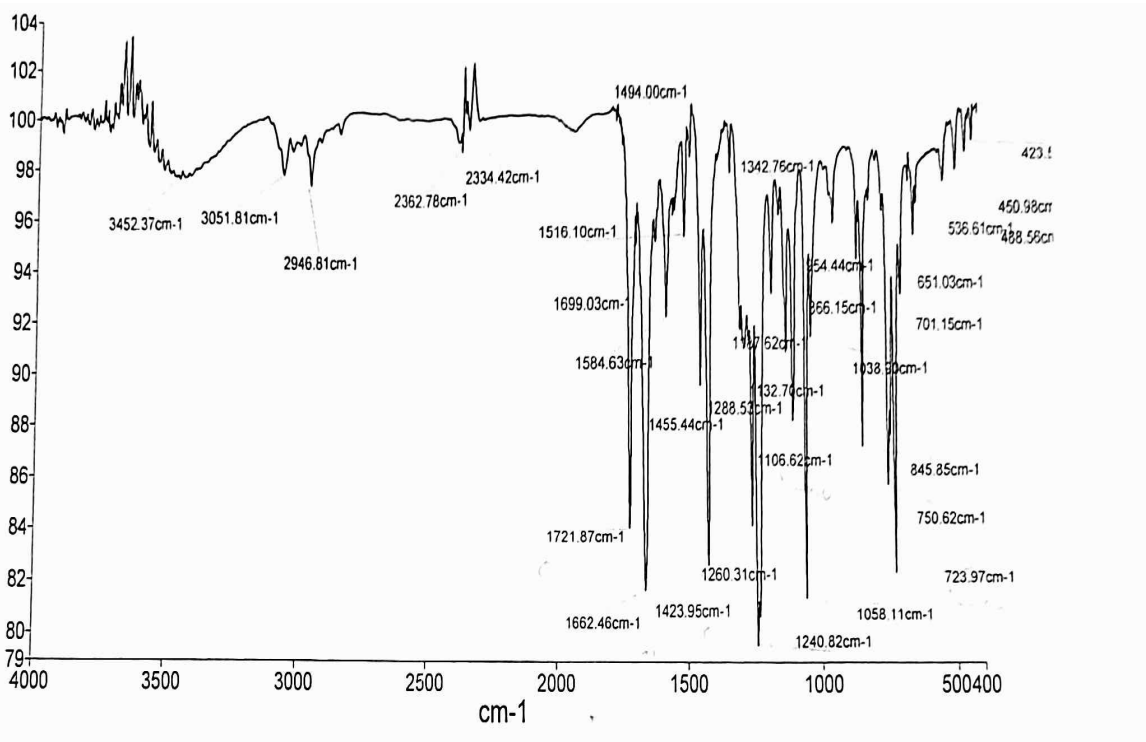

**Figure S15.** IR spectrum of Complex 3

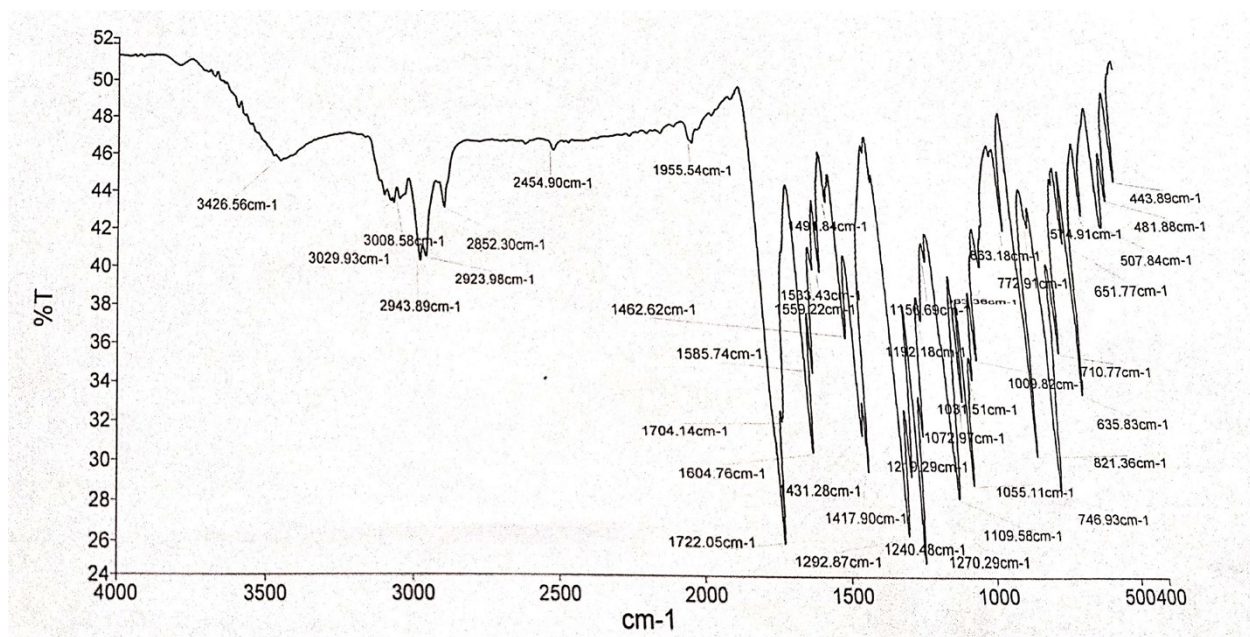

**Figure S16. IR spectra of Complex-4**

## The conformation to existence of complexes 1-4 in both solid and liquid

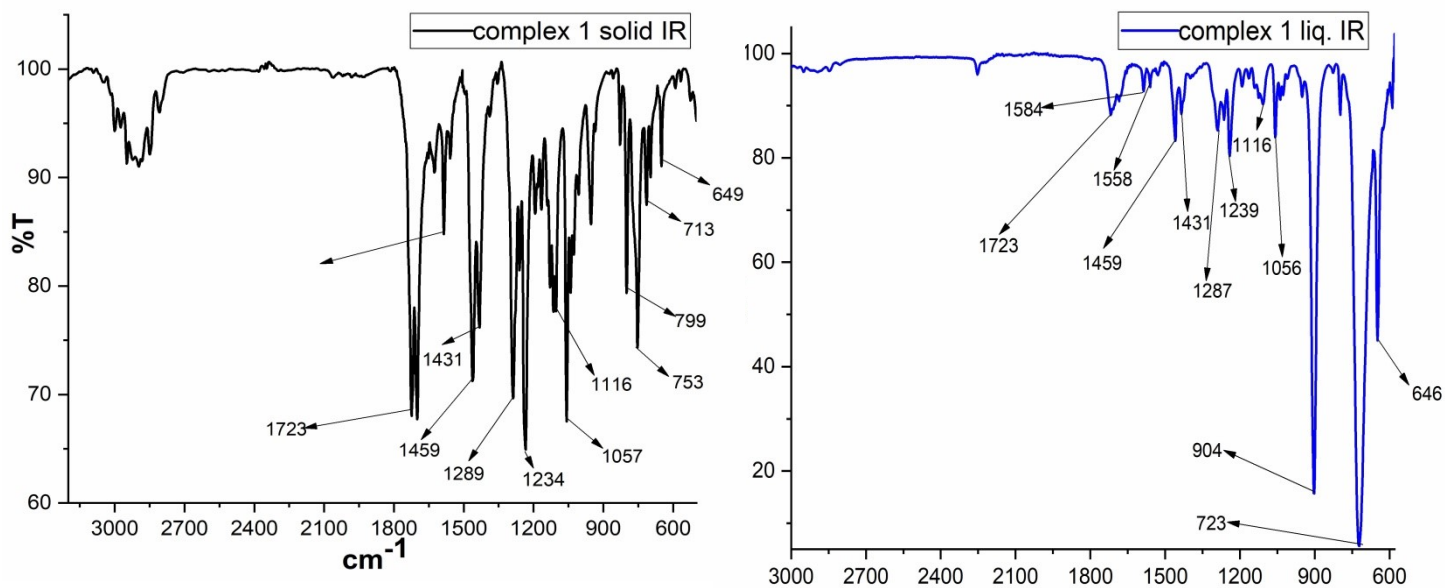

Figure S17 Solid and solution phase IR Spectra of complex 1

### phase via Solid and Liquid IR spectrum

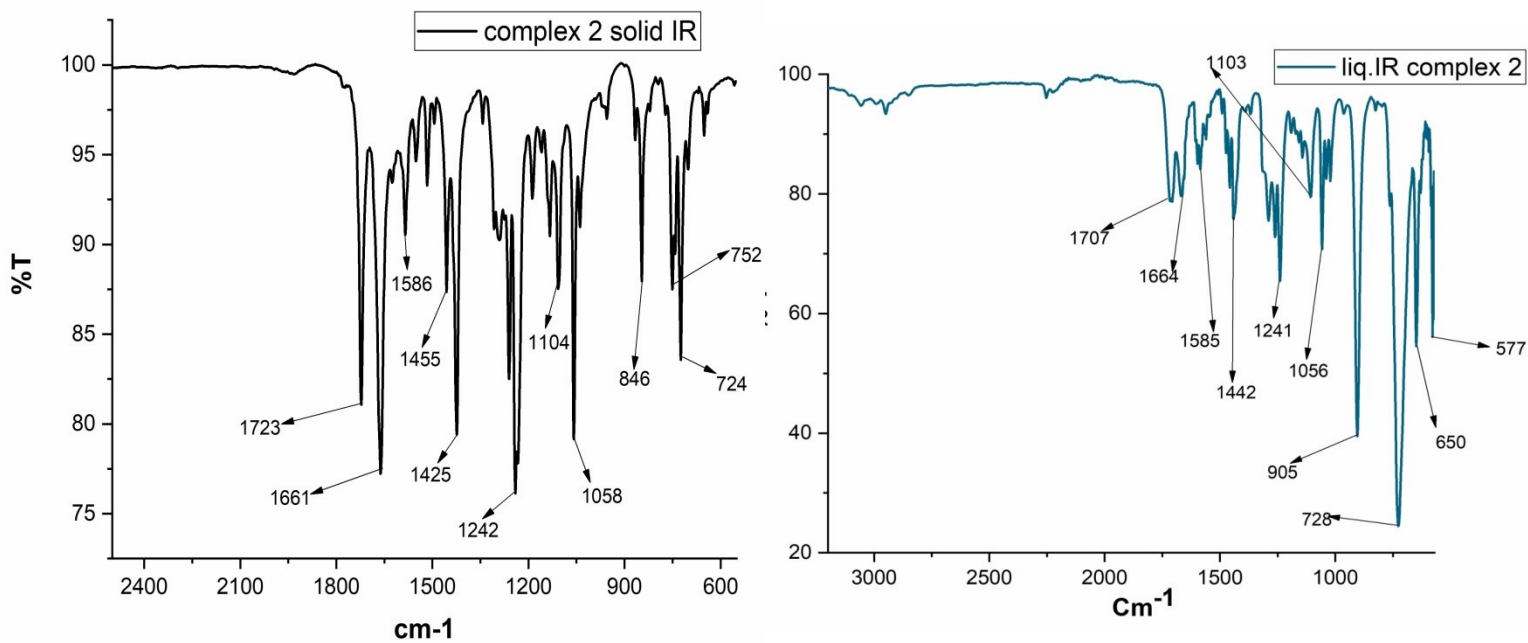

Figure S18 Solid and solution phase IR Spectra of complex 2

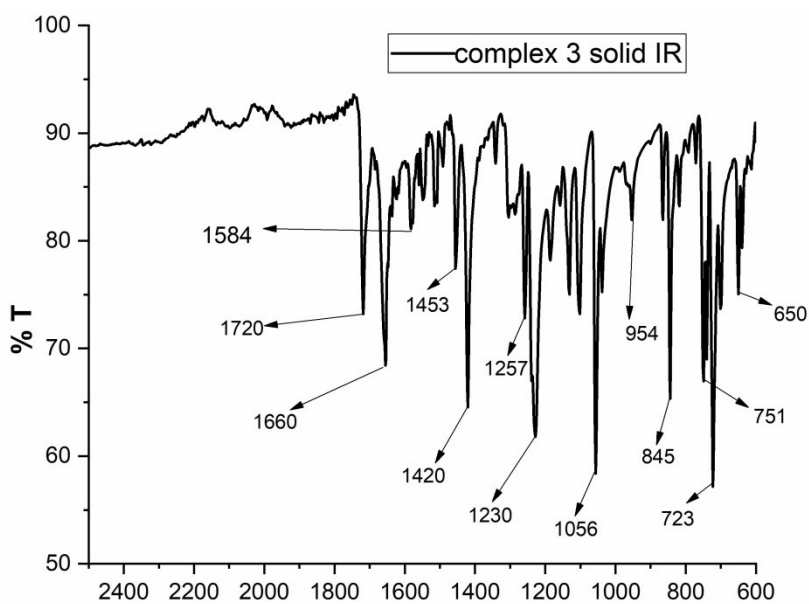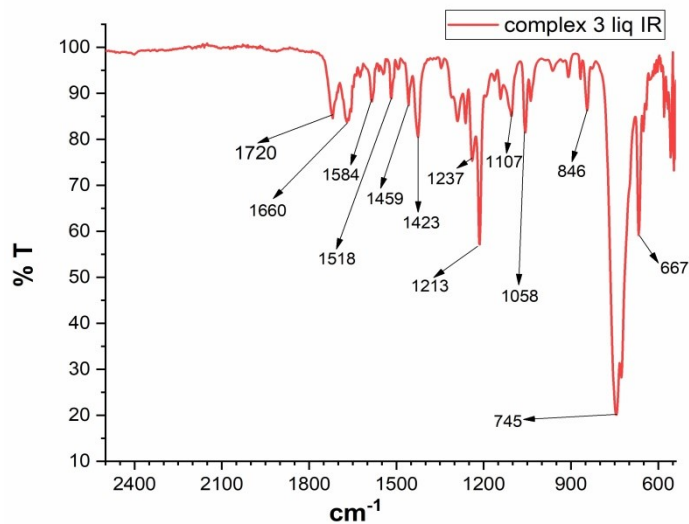

**Figure S19 Solid and solution phase IR Spectra of complex 3**

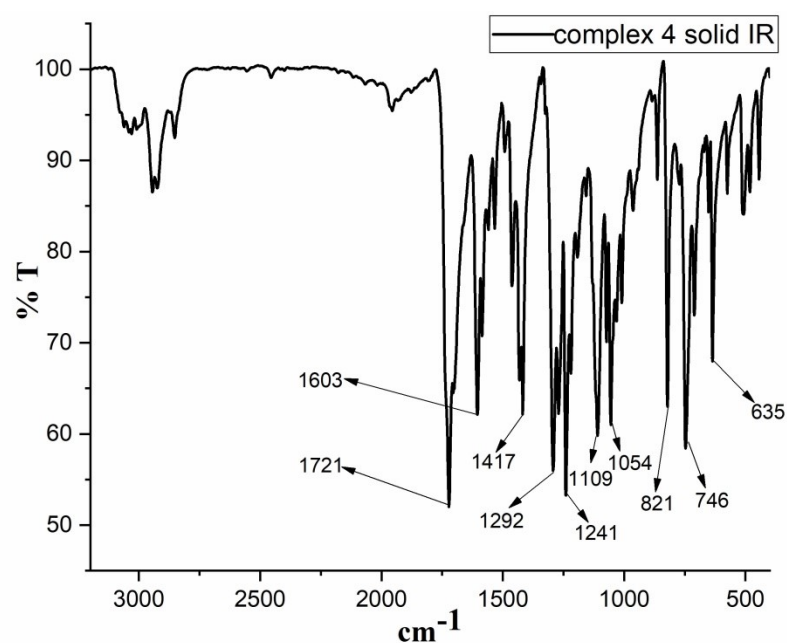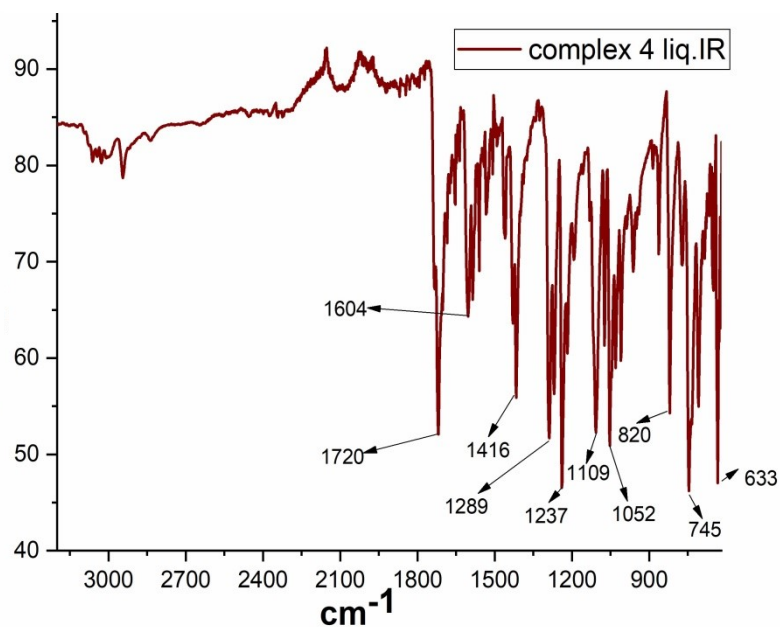

**Figure S20 Solid and solution phase IR Spectra of complex 4**

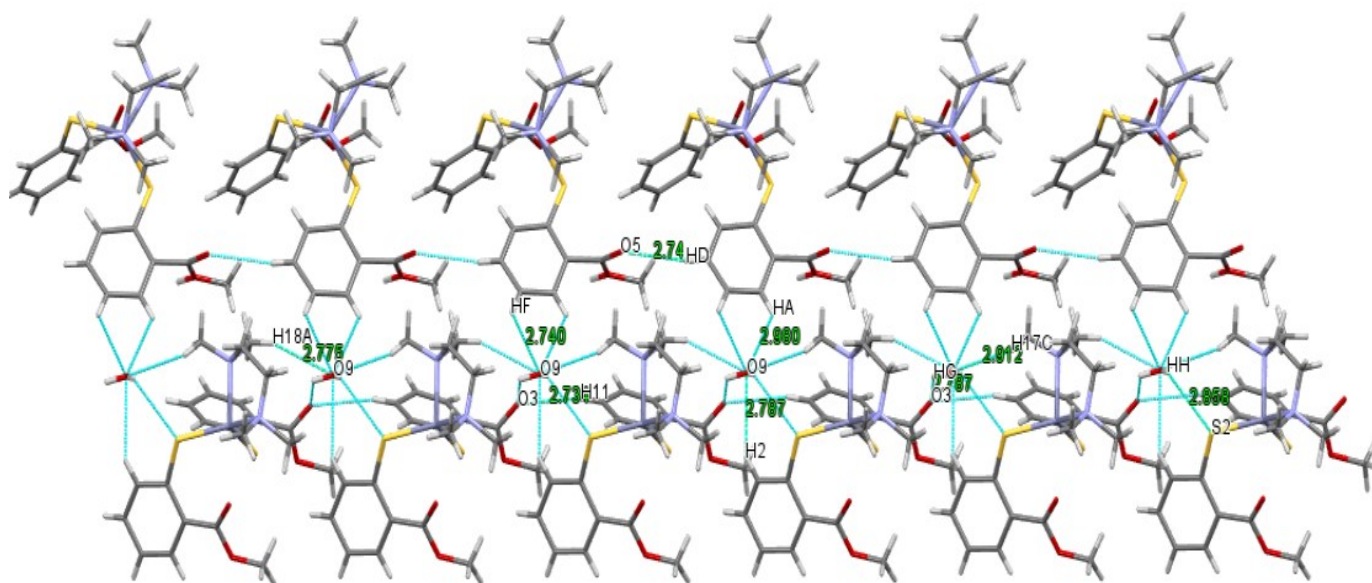

**Figure S21.** Packing diagram of **1** showing  $(sp^3)C-H\cdots O(H_2O)$ ,  $(sp^2)C-H\cdots O(H_2O)$ ,  $(sp^2)C-H\cdots O(C=O)$  and  $(H_2O)H\cdots S$  interactions (blue dotted line).

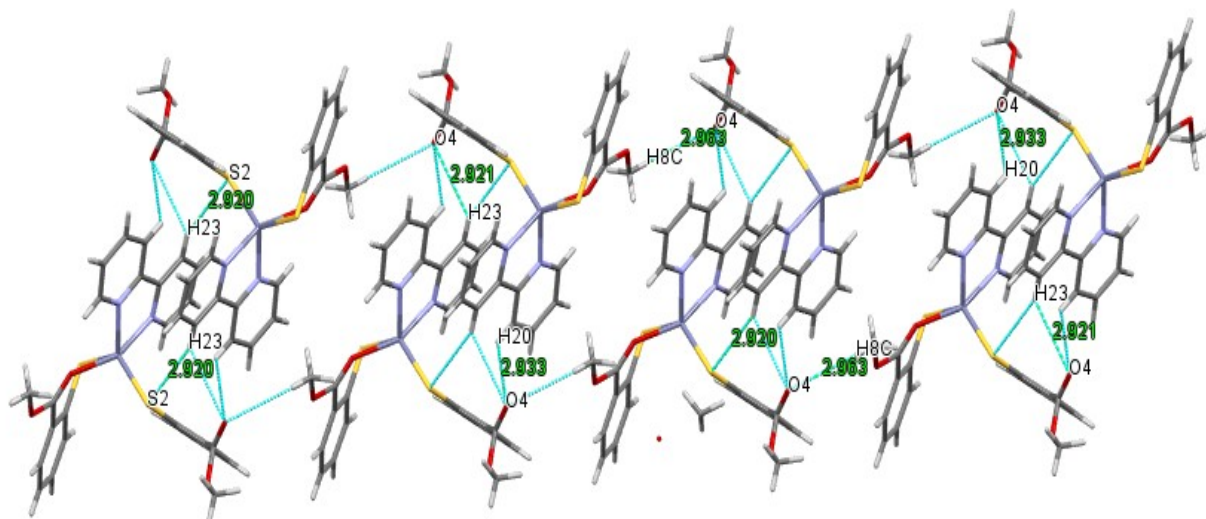

**Figure S22.** Packing diagram of **3** showing  $(sp^3)C-H\cdots O$ ,  $(sp^2)C-H\cdots O$ , and  $(sp^2)C-H\cdots S$  interactions (blue dotted line)

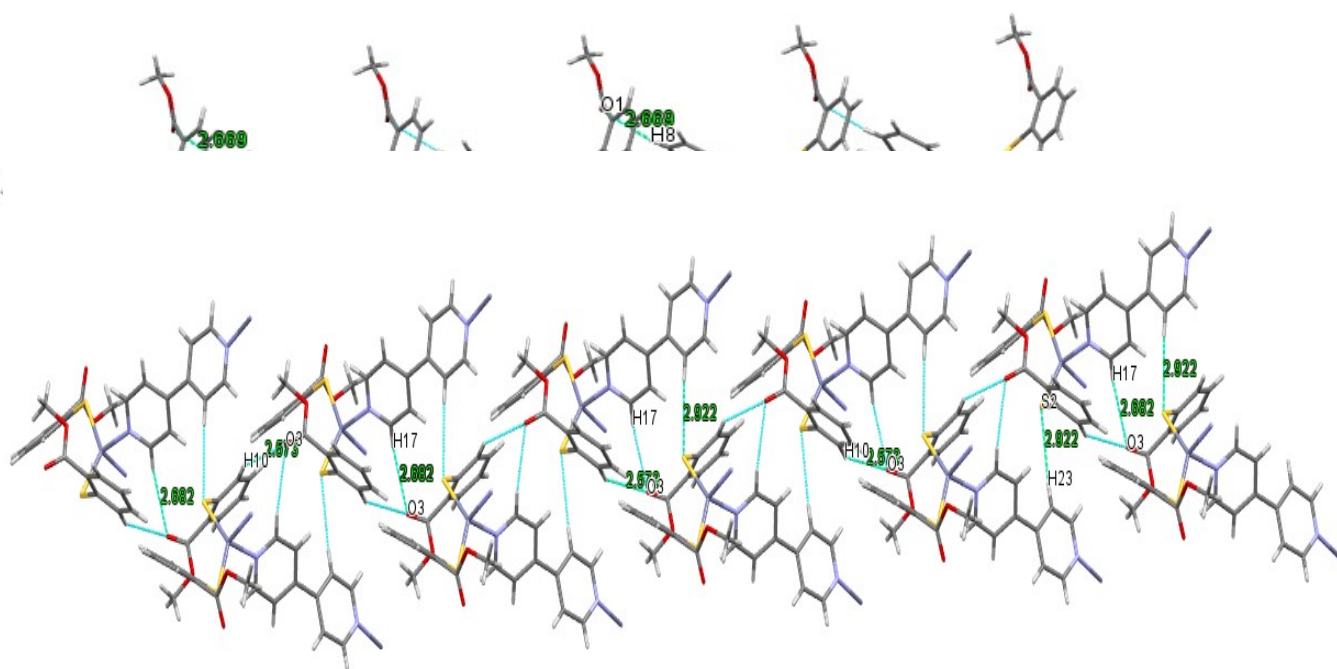

**Figure S23.** Packing diagram of **3** showing ( $sp^3$ ) C-H $\cdots$ O, ( $sp^2$ ) C-H $\cdots$ O, and ( $sp^2$ ) C-H $\cdots$ S interactions (green dotted line).

**Figure 24** Packing diagram of **4** showing ( $sp^3$ ) C-H $\cdots$ O, ( $sp^2$ )C-H $\cdots$ O, and ( $sp^2$ )C-H $\cdots$ S interactions.

### Calculated (DFT) and Experimental (Single Crystal X-ray Diffraction) Bond Lengths and Bond Angles

**Table S1. For complex 1**

| <b>Bond distance (Å)</b> | <b>Experimental (X-ray)</b> | <b>Calculated (DFT)</b> |
|--------------------------|-----------------------------|-------------------------|
| Zn(1)-S(2)               | 2.289(3)                    | 2.318                   |
| Zn(1)-S(1)               | 2.287(3)                    | 2.316                   |
| Zn(1)-N(1)               | 2.103(6)                    | 2.225                   |
| Zn(1)-N(2)               | 2.173(9)                    | 2.241                   |
| <b>Bond Angle (°)</b>    | <b>Experimental (X-ray)</b> | <b>Calculated (DFT)</b> |
| S(1)-Zn(1)-S(2)          | 123.14(11)                  | 127.50                  |
| N(1)-Zn(1)-S(2)          | 115.0(3)                    | 120.17                  |
| N(1)-Zn(1)-S(1)          | 112.4(3)                    | 100.06                  |
| N(1)-Zn(1)-N(2)          | 84.4(4)                     | 84.40                   |
| N(2)-Zn(1)-S(2)          | 103.3(3)                    | 106.49                  |
| N(2)-Zn(1)-S(1)          | 110.9(3)                    | 109.86                  |

**Table S2- For complex 2**

| <b>Bond distance (Å)</b> | <b>Experimental (X-ray)</b> | <b>Calculated (DFT)</b> |
|--------------------------|-----------------------------|-------------------------|
| Zn(1)-S(2)               | 2.3140(15)                  | 2.333                   |
| Zn(1)-S(1)               | 2.278(14)                   | 2.322                   |



|            |          |       |
|------------|----------|-------|
| Zn(1)-O(1) | 2.389(3) | 2.322 |
| Zn(1)-N(1) | 2.115(4) | 2.179 |
| Zn(1)-N(2) | 2.137(4) | 2.222 |

| <b>Bond Angle (Angle/°)</b> | <b>Experimental (X-ray)</b> | <b>Calculated (DFT)</b> |
|-----------------------------|-----------------------------|-------------------------|
| S(2)-Zn(1)-O(1)             | 87.01(10)                   | 88.85                   |
| S(1)-Zn(1)-S(2)             | 124.30(5)                   | 132.56                  |
| S(1)-Zn(1)-O(1)             | 82.48(9)                    | 84.14                   |
| N(1)-Zn(1)-S(2)             | 110.43(10)                  | 108.75                  |
| N(1)-Zn(1)-S(1)             | 122.89(10)                  | 117.75                  |
| N(1)-Zn(1)-O(1)             | 85.50(13)                   | 87.98                   |
| N(1)-Zn(1)-N(2)             | 76.62(15)                   | 74.61                   |
| N(2)-Zn(1)-S(2)             | 109.46(11)                  | 105.70                  |
| N(2)-Zn(1)-S(1)             | 97.86(11)                   | 95.27                   |
| N(2)-Zn(1)-O(1)             | 158.95(14)                  | 160.07                  |

**Table S3- For complex 3**

| <b>Bond distance<br/>(Å)</b>    | <b>Experimental<br/>(X-ray)</b> | <b>Calculated (DFT)</b>     |
|---------------------------------|---------------------------------|-----------------------------|
| Zn(1)-S(2)                      | 2.299(3)                        | 2.322                       |
| Zn(1)-S(1)                      | 2.280(3)                        | 2.319                       |
| Zn(1)-O(1)                      | 2.302(6)                        | 2.331                       |
| Zn(1)-N(2)                      | 2.142(7)                        | 2.180                       |
| Zn(1)-N(1)                      | 2.193(8)                        | 2.283                       |
| <b>Bond Angle<br/>(Angle/°)</b> | <b>Experimental<br/>(X-ray)</b> | <b>Calculated<br/>(DFT)</b> |
| S(2)-Zn(1)-O(1)                 | 102.54(2)                       | 92.48                       |
| S(1)-Zn(1)-S(2)                 | 131.04(12)                      | 138.48                      |
| S(1)-Zn(1)-O(1)                 | 84.2(2)                         | 84.99                       |
| N(2)-Zn(1)-S(2)                 | 95.2(2)                         | 101.38                      |
| N(2)-Zn(1)-S(1)                 | 133.7(2)                        | 114.07                      |
| N(2)-Zn(1)-O(1)                 | 85.1(3)                         | 85.06                       |
| N(2)-Zn(1)-N(1)                 | 76.73(3)                        | 74.96                       |
| N(1)-Zn(1)-S(2)                 | 104.89(2)                       | 106.67                      |
| N(1)-Zn(1)-S(1)                 | 89.73(2)                        | 94.51                       |
| N(1)-Zn(1)-O(1)                 | 148.3(3)                        | 158.98                      |

**Table S4-For complex 4**

| <b>Bond distance (Å)</b> | <b>Experimental (X-ray)</b> | <b>Calculated (DFT)</b> |
|--------------------------|-----------------------------|-------------------------|
| Zn(1)-S(1)               | 2.280(5)                    | 2.260                   |
| Zn(1)-S(2)               | 2.274(5)                    | 2.260                   |
| Zn(1)-N(2)               | 2.095(15)                   | 1.946                   |
| Zn(1)-N(1) <sup>1</sup>  | 2.112(15)                   | 1.958                   |

| <b>Bond Angle (Angle/°)</b> | <b>Experimental (X-ray)</b> | <b>Calculated (DFT)</b> |
|-----------------------------|-----------------------------|-------------------------|
| S(2)-Zn(1)-S(1)             | 126.78(2)                   | 113.36                  |
| N(2)-Z(1)-S(1)              | 104.17(5)                   | 104.59                  |
| N(2)-Zn(1)-S(2)             | 111.54(5)                   | 112.16                  |
| N(2)-Zn(1)-N(1)1            | 93.48(6)                    | 107.20                  |
| N(1)1-Zn(1)-S(1)            | 107.38(5)                   | 107.67                  |
| N(1)1-Zn(1)-S(2)            | 108.38(4)                   | 111.72                  |

**Table S5 - Second Order Perturbation Theory Analysis of  
complex 2**

| <b>Donor NBO (i)</b> | <b>Acceptor NBO (j)</b> | <b>E(2)<br/>kcal/mol</b> | <b>E(j)-E(i)<br/>a.u.</b> | <b>F(i,j)<br/>a.u.</b> |
|----------------------|-------------------------|--------------------------|---------------------------|------------------------|
| LP ( 1) O 4          | LP*( 6)Zn 1             | 6.51                     | 0.74                      | 0.068                  |
| LP ( 1) O 4          | LP*( 9)Zn 1             | 21.34                    | 0.82                      | 0.119                  |
| LP ( 3) S 3          | LP*( 6)Zn 1             | 67.92                    | 0.35                      | 0.142                  |
| LP ( 3) S 3          | LP*( 7)Zn 1             | 34.41                    | 0.45                      | 0.114                  |
| LP ( 3) S 3          | LP*( 8)Zn 1             | 1.70                     | 0.39                      | 0.024                  |
| LP ( 3) S 3          | LP*( 9)Zn 1             | 1.47                     | 0.43                      | 0.024                  |
| LP ( 3) S 2          | LP*( 6)Zn 1             | 89.34                    | 0.34                      | 0.161                  |
| LP ( 3) S 2          | LP*( 7)Zn 1             | 40.82                    | 0.45                      | 0.124                  |
| LP ( 3) S 2          | LP*( 8)Zn 1             | 3.63                     | 0.39                      | 0.035                  |
| LP ( 1) S 2          | LP*( 9)Zn 1             | 1.91                     | 0.54                      | 0.029                  |
| LP ( 1) N 5          | LP*( 6)Zn 1             | 14.35                    | 0.47                      | 0.080                  |
| LP ( 1) N 5          | LP*( 8)Zn 1             | 31.61                    | 0.52                      | 0.115                  |
| LP ( 1) N 7          | LP*( 6)Zn 1             | 15.77                    | 0.47                      | 0.083                  |
| LP ( 1) N 7          | LP*( 8)Zn 1             | 8.74                     | 0.51                      | 0.060                  |
| LP ( 1) N 7          | LP*( 9)Zn 1             | 21.72                    | 0.55                      | 0.098                  |

**Table S6- Second Order Perturbation Theory Analysis of  
complex 3**

| <b>Donor NBO (i)</b> | <b>Acceptor NBO (j)</b> | <b>E(2)<br/>kcal/mol</b> | <b>E(j)-E(i)<br/>a.u.</b> | <b>F(i,j)<br/>a.u.</b> |
|----------------------|-------------------------|--------------------------|---------------------------|------------------------|
| LP ( 1) N 6          | LP*( 6)Zn 1             | 12.86                    | 0.47                      | 0.076                  |
| LP ( 1) N 6          | LP*( 8)Zn 1             | 27.69                    | 0.53                      | 0.109                  |
| LP ( 1) N 6          | LP*( 9)Zn 1             | 7.05                     | 0.55                      | 0.056                  |
| LP ( 1) N 7          | LP*( 6)Zn 1             | 13.25                    | 0.46                      | 0.076                  |
| LP ( 1) N 7          | LP*( 8)Zn 1             | 15.97                    | 0.52                      | 0.082                  |
| LP ( 1) N 7          | LP*( 9)Zn 1             | 12.88                    | 0.54                      | 0.075                  |
| LP ( 3) S 2          | LP*( 6)Zn 1             | 87.75                    | 0.35                      | 0.162                  |
| LP ( 3) S 2          | LP*( 7)Zn 1             | 49.22                    | 0.47                      | 0.139                  |
| LP ( 2) S 2          | LP*( 8)Zn 1             | 9.62                     | 0.34                      | 0.051                  |
| LP ( 2) S 2          | LP*( 9)Zn 1             | 2.11                     | 0.36                      | 0.025                  |
| LP ( 3) S 3          | LP*( 6)Zn 1             | 69.96                    | 0.36                      | 0.148                  |
| LP ( 3) S 3          | LP*( 7)Zn 1             | 40.16                    | 0.48                      | 0.126                  |
| LP ( 3) S 3          | LP*( 8)Zn 1             | 1.75                     | 0.42                      | 0.025                  |
| LP ( 1) O 4          | LP*( 6)Zn 1             | 6.48                     | 0.74                      | 0.069                  |
| LP ( 1) O 4          | LP*( 9)Zn 1             | 21.44                    | 0.81                      | 0.120                  |

## UV-Vis absorption spectra (Experimental and Calculated)

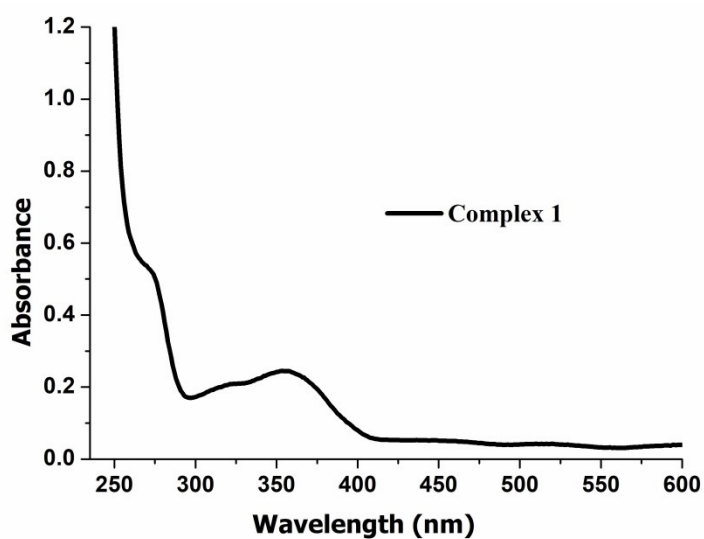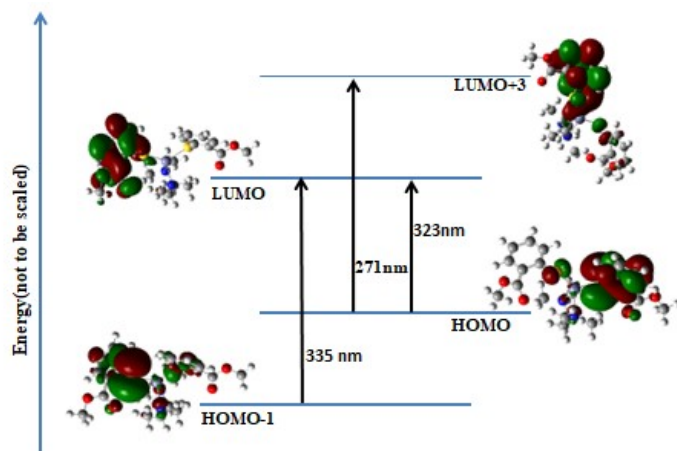

**Figure –S25-(a)** U V spectrum of complex 1 (b) Selected molecular orbitals of complex 1 showing electronic transitions (orbital contour value = 0.02).

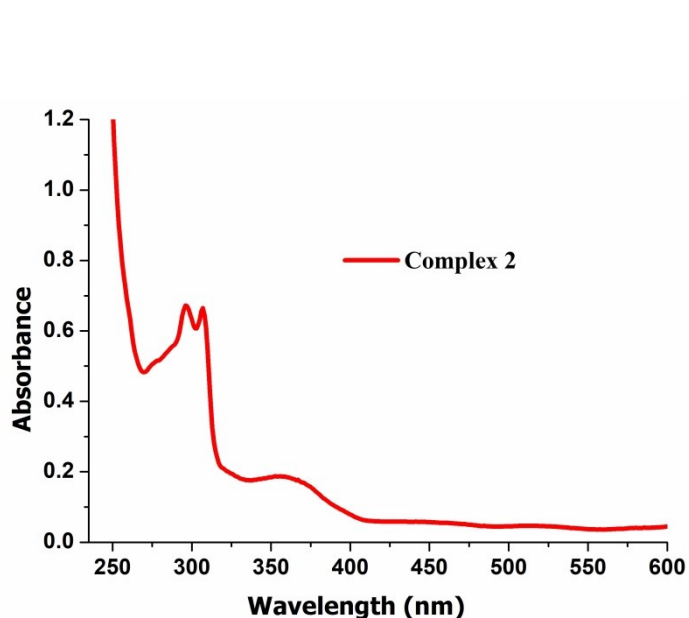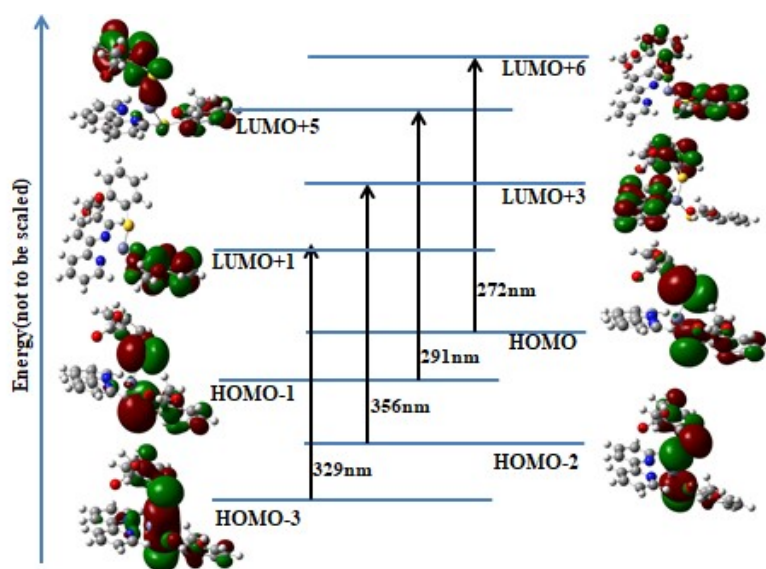

**Figure S26-(a)** U V spectrum of complex 2 (b) Selected molecular orbitals of complex 2 showing electronic transitions (orbital contour value = 0.02).

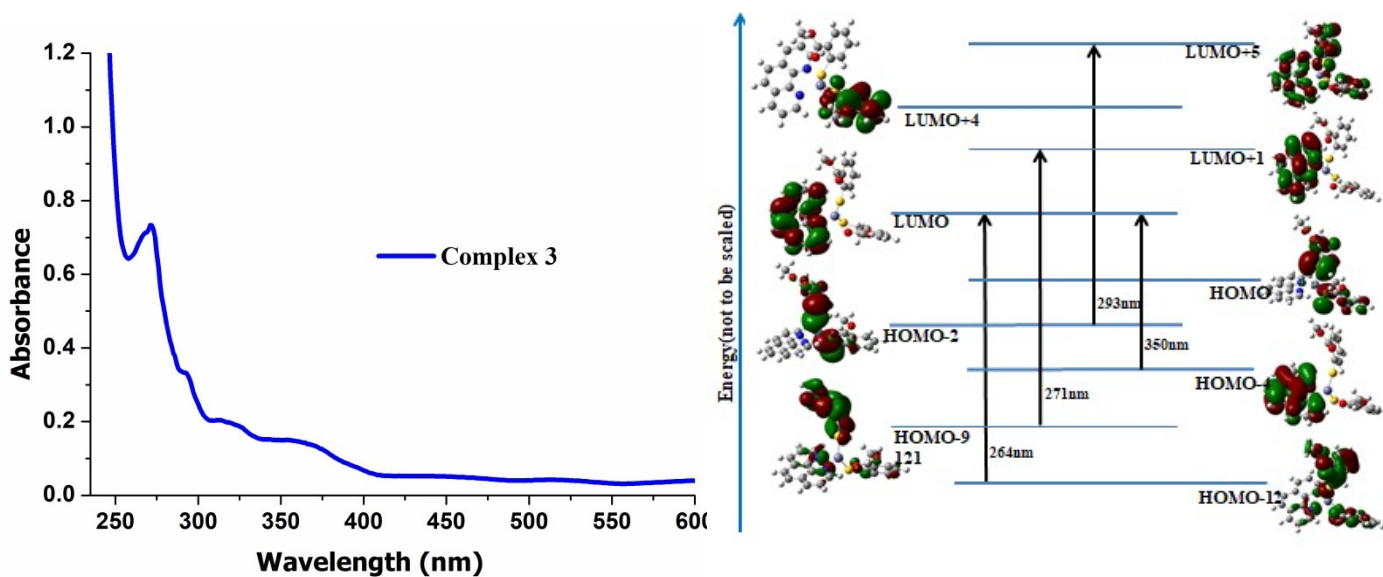

**Figure –S27 (a)** U V spectrum of complex 3 (b) Selected molecular orbitals of complex 3 showing electronic transitions (orbital contour value = 0.02).

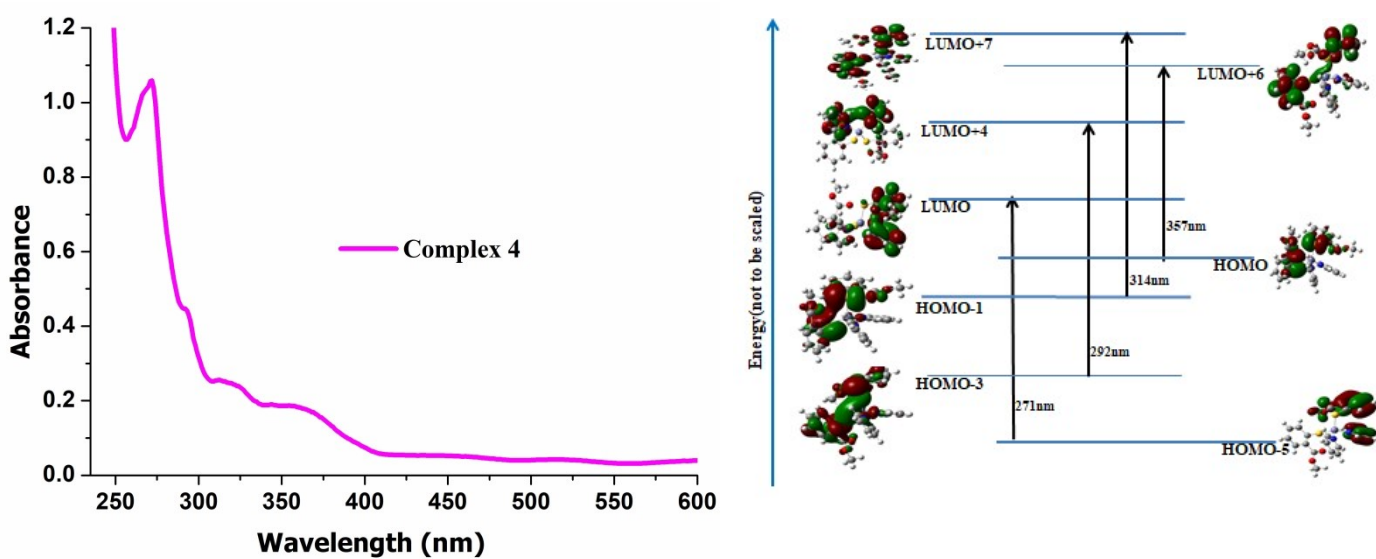

**Figure –S28 (a)** U V spectrum of complex 4 (b) Rrepresented Selected molecular orbitals of complex 4 showing electronic transitions (orbital contour value = 0.02).

## Molecular docking results of Complex 1-4 with the targeted proteins expressed in cancer

| Table S7. For complex 1 |           |            |                                 |                                                                                                                                        |
|-------------------------|-----------|------------|---------------------------------|----------------------------------------------------------------------------------------------------------------------------------------|
| Proteins                | Pocket ID | Vina Score | Cavity volume (Å <sup>3</sup> ) | Interacting amino acids                                                                                                                |
| <b>VEGF</b>             | C1        | -5.2       | 95                              | <b>Chain E:</b> TYR139 SER140 GLU141 PHE172 PRO173 LEU204 THR206 GLU208 LYS217 THR218 ASN219                                           |
|                         | C2        | -4.9       | 84                              | <b>Chain E:</b> PRO163 ASN164 ILE165 THR166 VAL167 PRO179 GLY181 ILE184 ILE185 TRP186 ASP187 PHE192                                    |
|                         | C3        | -4.8       | 83                              | <b>Chain E:</b> ARG133 PRO134 THR161 SER162 ASN164 ILE165 THR166 THR210 VAL211 ASN212                                                  |
|                         | C4        | -4.6       | 77                              | <b>Chain E:</b> THR166 VAL167 THR168 LEU169 LYS170 THR176 LEU177 ILE178 PRO179 GLU208 ALA209 THR210 LEU215                             |
|                         | C5        | -5.5       | 73                              | <b>Chain E:</b> GLU144 ILE145 ILE146 HIS147 MET148 THR149 ARG152 GLU153 LEU154 VAL155 PRO157 GLN225                                    |
| <b>TGFB1</b>            | C1        | -5.1       | 126                             | <b>Chain A:</b> LEU20 ILE22 LEU28 TRP30 TYR39 ALA41 ASN42 PHE43 CYS44 CYS78 PRO80 LEU83 ASN103 MET104 VAL106                           |
|                         | C2        | -4.9       | 83                              | <b>Chain A:</b> CYS7 PHE8 SER10 THR11 GLU12 LYS13 CYS16 VAL17 ARG18 GLN19 PHE43 LEU45 GLY46                                            |
|                         | C3        | -5.3       | 56                              | <b>Chain A:</b> PRO47 CYS48 PRO49 TYR50 ALA63 ASN66 GLN67 PRO70 GLY71 ALA72 ALA75 PRO76                                                |
|                         | C4        | -5.1       | 49                              | <b>Chain A:</b> THR4 PHE8 GLN19 PRO36 TYR39 HIS40 ASN42 GLU84 LEU86 PRO87 ILE105 VAL106 ARG107                                         |
|                         | C5        | -5         | 44                              | <b>Chain A:</b> CYS7 PHE8 SER10 THR11 GLU12 LYS13 CYS16 VAL17 ARG18 GLN19 PHE43 LEU45 GLY46                                            |
| <b>BRAF</b>             | C1        | -6.8       | 2436                            | <b>Chain A:</b> ILE463 GLY464 VAL471 ALA481 LYS483 GLN530 TRP531 CYS532 GLY534 SER535 SER536 HIS539 ASN580 PHE583 ASP594 PHE595 LEU597 |
|                         | C2        |            |                                 | <b>Chain B:</b> SER467 ALA497 ASN500 GLU501 VAL504 LEU505 THR508 LEU567 ILE572                                                         |



|            |    |      |      |                                                                                                                                                  |
|------------|----|------|------|--------------------------------------------------------------------------------------------------------------------------------------------------|
|            |    |      |      | ILE573 HIS574 ARG575 ASP576 GLY593<br>ASP594                                                                                                     |
|            | C3 | -6.6 | 1855 | <b>Chain A:</b> VAL511 ASP555 ARG558 GLN559<br>ARG562 ASN588 THR589                                                                              |
|            |    |      |      | <b>Chain B:</b> ASP479 GLN530 TRP531 GLU533<br>HIS585 GLU586                                                                                     |
|            | C4 | -7.2 | 1065 | <b>Chain A:</b> ALA497 ASN500 GLU501 VAL504<br>LEU505 LEU567 ILE572 ILE573 HIS574<br>ARG575 ASP576 GLY593 ASP594 GLY596<br>THR599                |
|            | C5 | -4.1 | 309  | <b>Chain B:</b> LEU674 SER675 PRO676 ASP677<br>LEU678 MET693 ALA694 LEU697 LYS698<br>LYS699                                                      |
| <b>p53</b> | C1 | -5.7 | 413  | <b>Chain B:</b> SER1742 ASP1743 ALA1746<br>HIS1809 ARG1811 TYR1852 LEU1854<br>GLU1945 GLN1949 LYS1964 TYR1969                                    |
|            | C2 | -6.8 | 272  | <b>Chain B:</b> LEU1931 ALA1934 GLU1935<br>GLN1938 LEU1939 PRO1940 VAL1941<br>VAL1942 PHE1959 LYS1960 HIS1962<br>TYR1965 LYS1966 HIS1967 ASP1968 |
|            | C3 | -4.7 | 265  | <b>Chain B:</b> PRO1769 PRO1770 PHE1771<br>ASP1807 SER1827 HIS1828 VAL1829 HIS1832<br>ASP1833                                                    |
|            | C4 | -5.1 | 187  | <b>Chain B:</b> GLN1801 GLY1822 PRO1824<br>TYR1843 ARG1844 LEU1847 TRP1862<br>PRO1864 ARG1865                                                    |
|            | C5 | -6   | 113  | <b>Chain B:</b> ARG1811 PHE1884 THR1922<br>ASP1923 PRO1924 SER1943 GLN1944<br>GLU1945 LYS1964 HIS1967 TYR1969<br>VAL1970                         |
| <b>BSA</b> | C1 | -6   | 8389 | <b>Chain A:</b> THR190 ARG194 ARG217 GLN220<br>ALA290 GLU291 LYS294 GLU339 TYR340<br>ALA341 VAL342 LYS439 GLU443 PRO446<br>CYS447 ASP450 TYR451  |
|            | C2 | -6.3 | 3498 | <b>Chain A:</b> ASP108 SER109 PRO110 ASP111<br>LEU112 PRO113 LYS114 ARG144 PRO420<br>VAL423 GLU424 ARG458 ILE522                                 |
|            | C3 | -5.2 | 1508 | <b>Chain A:</b> GLU503 LYS504 PHE506 THR507<br>PHE508 HIS509 ALA568 GLY571 PRO572<br>VAL575                                                      |
|            | C4 | -5.6 | 793  | <b>Chain A:</b> GLU100 LEU103 SER104 ILE202<br>GLN203 LYS204 LYS242 CYS245 HIS246<br>ASP248                                                      |
|            | C5 |      |      | <b>Chain A:</b> LEU386 GLN389 ASN390 GLN393                                                                                                      |

|  |  |  |  |                                                            |
|--|--|--|--|------------------------------------------------------------|
|  |  |  |  | VAL408 ARG409 ARG412 LYS413 SER488<br>LEU490 THR491 PRO492 |
|--|--|--|--|------------------------------------------------------------|

| <b>Table S8. For complex 2</b> |                  |                   |                                      |                                                                                                                                                                           |
|--------------------------------|------------------|-------------------|--------------------------------------|---------------------------------------------------------------------------------------------------------------------------------------------------------------------------|
| <b>Proteins</b>                | <b>Pocket ID</b> | <b>Vina Score</b> | <b>Cavity volume (Å<sup>3</sup>)</b> | <b>Interacting amino acids</b>                                                                                                                                            |
| <b>VEGF</b>                    | C1               | -6                | 95                                   | <b>Chain E:</b> SER140 GLU141 LYS170 LYS171 PHE172 PRO173 LEU174 LEU204 THR206 GLU208 LYS217 ASN219                                                                       |
|                                | C2               | -5.3              | 84                                   | <b>Chain E:</b> PRO163 ASN164 ILE165 THR166 VAL167 PRO179 ASP180 GLY181 ILE184 ILE185 TRP186 SER188                                                                       |
|                                | C3               | -4.8              | 83                                   | <b>Chain E:</b> ARG133 PRO134 THR161 SER162 ASN164 ILE165 THR210 VAL211 ASN212                                                                                            |
|                                | C4               | -4.7              | 77                                   | <b>Chain E:</b> ARG133 PRO134 THR161 SER162 ASN164 ILE165 THR210 VAL211 ASN212                                                                                            |
|                                | C5               | -5.7              | 73                                   | <b>Chain E:</b> GLU137 GLU144 ILE145 ILE146 HIS147 GLU153 LEU154 VAL155 PRO157 ARG159 ARG189 LYS190                                                                       |
| <b>TGFB1</b>                   | C1               | -5.6              | 126                                  | <b>Chain A:</b> LEU20 ILE22 LEU28 TYR39 ALA41 ASN42 PHE43 CYS44 CYS78 VAL79 PRO80 LEU83 ASN103 MET104 ILE105 VAL106                                                       |
|                                | C2               | -5                | 83                                   | <b>Chain A:</b> ASP23 PHE24 ARG25 TRP30 LYS31 TRP32 ILE33 HIS34 GLU35 PRO36 LYS37                                                                                         |
|                                | C3               | -5.9              | 56                                   | <b>Chain A:</b> PRO47 CYS48 PRO49 TYR50 ALA63 ASN66 GLN67 PRO70 GLY71 ALA72 ALA75 PRO76                                                                                   |
|                                | C4               | -5.9              | 49                                   | <b>Chain A:</b> THR4 PHE8 GLN19 TYR21 PRO36 GLY38 TYR39 HIS40 ASN42 GLU84 PRO85 LEU86 PRO87 ILE105 VAL106 ARG107                                                          |
|                                | C5               | -5.9              | 44                                   | <b>Chain A:</b> CYS7 SER10 THR11 GLU12 LYS13 CYS16 ARG18 GLN19 PHE43 LEU45                                                                                                |
| <b>BRAF</b>                    | C1               | -8.2              | 2436                                 | <b>Chain A:</b> ILE463 GLY464 SER465 VAL471 ALA481 LYS483 LEU514 TRP531 CYS532 GLY534 SER535 SER536 HIS539 ASN580 PHE583 ASP594 PHE595 LEU597                             |
|                                | C2               | -8.7              | 2121                                 | <b>Chain B:</b> ILE463 GLY464 SER465 GLY466 SER467 VAL471 ALA481 VAL482 LYS483 LEU514 ILE527 THR529 GLN530 TRP531 CYS532 GLY534 SER535 SER536 PHE583 ASP594 PHE595 GLY596 |
|                                | C3               |                   |                                      | <b>Chain A:</b> VAL511 ASN512 ASP555 ARG558 GLN559 ARG562 HIS585 ASN588 THR589<br><b>Chain B:</b> ASP479 TRP531 GLU533 HIS585                                             |

|            |    |      |      |                                                                                                                                                                                |
|------------|----|------|------|--------------------------------------------------------------------------------------------------------------------------------------------------------------------------------|
|            |    |      |      | GLU586 THR589                                                                                                                                                                  |
|            | C4 | -8.3 | 1065 | <b>Chain A:</b> PHE468 LYS483 ALA497 ASN500<br>GLU501 VAL504 LEU505 LEU567 ILE572<br>ILE573 HIS574 ARG575 GLY593 ASP594<br>GLY596 LEU597 THR599 TYR633                         |
|            | C5 | -5   | 309  | <b>Chain B:</b> LEU674 SER675 LEU678 ALA694<br>LEU697 LYS698 LYS699                                                                                                            |
| <b>P53</b> | C1 | -6.6 | 470  | <b>Chain A:</b> THR102 GLN104 PHE109 ARG110<br>LEU111 GLY112 PHE113 TYR126 PRO128<br>ALA129 ASN131 TRP146 ASN268 SER269                                                        |
|            | C2 | -6.3 | 215  | <b>Chain A:</b> VAL197 GLU198 GLY199 LEU201<br>ARG202 VAL218 PRO219 GLU221 PRO222<br>PRO223 CYS229 THR230 THR231 ILE232<br>HIS233                                              |
|            | C3 | -5.8 | 208  | <b>Chain A:</b> LEU145 VAL157 VAL197 GLU198<br>GLY199 LEU201 VAL218 PRO219 TYR220<br>GLU221 PRO222 PRO223 CYS229 THR230<br>THR231 ILE232 HIS233                                |
|            | C4 | -6.8 | 127  | <b>Chain A:</b> SER96 PRO98 SER99 ARG156<br>ARG158 MET160 LEU206 ASP208 THR211<br>ARG213 SER215 ILE254 THR256 GLU258<br>SER261 GLY262 ASN263 LEU264 ARG267                     |
|            | C5 | -4.3 | 101  | <b>Chain A:</b> VAL147 ASP148 SER149 THR150<br>TYR220 PRO222 PRO223 GLU228                                                                                                     |
| <b>BSA</b> | C1 | -6.5 | 8389 | <b>Chain A:</b> ARG194 ARG217 GLN220 LYS221<br>ALA290 GLU291 VAL292 GLU293 LYS294<br>PRO338 GLU339 TYR340 ALA341 VAL342<br>ARG435 LYS439 GLU443 PRO446 CYS447<br>ASP450 TYR451 |
|            | C2 | -7.1 | 3498 | <b>Chain A:</b> ASP108 SER109 PRO110 ASP111<br>LEU112 LYS114 ARG144 PRO420 VAL423<br>GLU424 ARG427 ARG458 THR518 GLU519<br>ILE522                                              |
|            | C3 | -5.8 | 1508 | <b>Chain A:</b> PHE501 GLU503 LYS504 PHE506<br>THR507 PHE508 HIS509 PHE567 ALA568<br>GLY571 PRO572 VAL575                                                                      |
|            | C4 | -6   | 793  | <b>Chain A:</b> GLU100 LEU103 SER104 TYR147<br>CYS199 ILE202 GLN203 LYS204 LYS242<br>CYS245 HIS246                                                                             |
|            | C5 | -6.6 | 356  | <b>Chain A:</b> LEU386 GLN389 ASN390 GLN393<br>ALA405 VAL408 ARG409 ARG412 LYS413<br>SER488 ALA489 LEU490 THR491 PRO492                                                        |

**Table S9. For complex 3**

| <b>Proteins</b> | <b>Pocket ID</b> | <b>Vina Score</b> | <b>Cavity volume (Å<sup>3</sup>)</b> | <b>Interacting amino acids</b> |
|-----------------|------------------|-------------------|--------------------------------------|--------------------------------|
|-----------------|------------------|-------------------|--------------------------------------|--------------------------------|

|              |    |      |      |                                                                                                                                                           |
|--------------|----|------|------|-----------------------------------------------------------------------------------------------------------------------------------------------------------|
| <b>VEGF</b>  | C1 | -6.4 | 95   | <b>Chain E:</b> MET138 TYR139 SER140 GLU141 PRO143 PHE172 LEU204 THR206 LEU215 TYR216 LYS217 ASN219                                                       |
|              | C2 | -5.5 | 84   | <b>Chain E:</b> ILE165 THR166 VAL167 THR168 LEU169 THR176 LEU177 ILE178 PRO179 ASP180 GLY181 TRP186                                                       |
|              | C3 | -5.7 | 83   | <b>Chain E:</b> ARG133 PRO134 THR161 SER162 ASN164 ILE165 THR166 THR210 VAL211 ASN212 TYR216                                                              |
|              | C4 | -5.7 | 77   | <b>Chain E:</b> ARG133 PRO134 THR161 SER162 ASN164 ILE165 THR166 THR210 VAL211 ASN212                                                                     |
|              | C5 | -6.3 | 73   | <b>Chain E:</b> GLU144 ILE145 ILE146 HIS147 MET148 THR149 ARG152 GLU153 VAL155 PRO157 GLN225                                                              |
| <b>TGFBI</b> | C1 | -6.8 | 126  | <b>Chain A:</b> LEU20 TYR21 ILE22 ASP27 LEU28 TYR39 ALA41 ASN42 PHE43 CYS44 PRO80 LEU83 ASN103 MET104 ILE105 VAL106                                       |
|              | C2 | -5.9 | 83   | <b>Chain A:</b> PHE24 ARG25 TRP30 LYS31 TRP32 ILE33 HIS34 GLU35 PRO36 LYS37 TYR91 VAL92 GLY93                                                             |
|              | C3 | -6.1 | 56   | <b>Chain A:</b> ASN14 GLY46 PRO47 CYS48 PRO49 TYR50 ASN66 GLN67 PRO70 GLY71 ALA72 SER73 ALA74 ALA75 PRO76                                                 |
|              | C4 | -5.7 | 49   | <b>Chain A:</b> THR4 PHE8 GLN19 PRO36 GLY38 TYR39 HIS40 ASN42 LEU86 PRO87 ILE105 ARG107                                                                   |
|              | C5 | -6.4 | 44   | <b>Chain A:</b> CYS7 PHE8 SER10 THR11 GLU12 LYS13 VAL17 ARG18 GLN19 PHE43 LEU45 GLY46                                                                     |
| <b>BRAF</b>  | C1 | -9.6 | 2436 | <b>Chain A:</b> ILE463 GLY464 VAL471 ALA481 LYS483 LEU514 THR529 GLN530 TRP531 CYS532 GLY534 SER535 SER536 HIS539 ASN580 PHE583 PHE595 LEU597             |
|              | C2 | -8   | 2121 | <b>Chain B:</b> SER467 ALA497 ASN500 GLU501 VAL504 LEU505 THR508 ILE513 LEU567 ILE572 ILE573 HIS574 ARG575 ASP576 GLY593 ASP594                           |
|              | C3 | -8.3 | 1855 | <b>Chain A:</b> VAL511 ASN512 ASP555 GLN559 ARG562 HIS585 GLU586 ASN588 THR589<br><b>Chain B:</b> ASP479 GLN530 TRP531 GLU533 HIS585 GLU586 ASN588 THR589 |
|              | C4 | -8.6 | 1065 | <b>Chain A:</b> GLN493 ALA497 ASN500 GLU501 VAL504 LEU505 LEU567 ILE572 ILE573 HIS574 ARG575 GLY593 ASP594 GLY596 THR599 TYR633                           |
|              | C5 | -5.3 | 309  | <b>Chain B:</b> SER675 PRO676 LEU678 ALA694 LEU697 LYS698 LYS699 LYS700 GLU703                                                                            |
| <b>P53</b>   | C1 | -7.8 | 413  | <b>Chain B:</b> SER1742 ASP1743 LEU1745 ALA1746 SER1749 ARG1811 TYR1852 LEU1854 SER1943 GLN1944 GLU1945 GLN1949 LYS1964 TYR1969                           |

|            |    |      |      |                                                                                                                                                                 |
|------------|----|------|------|-----------------------------------------------------------------------------------------------------------------------------------------------------------------|
|            | C2 | -7.4 | 272  | <b>Chain B:</b> LEU1931 LYS1932 ALA1934 GLU1935 GLN1938 LEU1939 PRO1940 VAL1941 PHE1959 LYS1960 TYR1965 LYS1966 HIS1967 ASP1968                                 |
|            | C3 | -6   | 265  | <b>Chain B:</b> PRO1769 PRO1770 PHE1771 ASP1807 SER1827 HIS1828 VAL1829 HIS1832 ASP1833 TYR1846 LEU1848 PRO1849                                                 |
|            | C4 | -6.3 | 187  | <b>Chain B:</b> GLN1801 SER1821 GLY1822 PRO1824 TYR1843 ARG1844 LEU1847 TRP1862 PRO1864 ARG1865 GLU1866 ASN1867                                                 |
|            | C5 | -7.9 | 113  | <b>Chain B:</b> THR1740 SER1742 ARG1811 PHE1816 PHE1884 THR1922 ASP1923 PRO1924 SER1943 GLN1944 GLU1945 ILE1948 LYS1964 LYS1966 HIS1967 TYR1969 VAL1970 SER1971 |
| <b>BSA</b> | C1 | -8.1 | 8389 | <b>Chain A:</b> TYR149 GLU152 TYR156 GLU186 LYS187 THR190 SER191 ARG194 ARG198 TRP213 ARG217 ARG256 HIS287 ALA290 GLU291 TYR451                                 |
|            | C2 | -9.9 | 3498 | <b>Chain A:</b> LYS114 HIS145 ARG185 GLU186 LEU189 THR190 SER192 ALA193 GLU424 ARG427 SER428 LYS431 ARG435 TYR451 LEU454 ILE455 ARG458 THR518 ILE522            |
|            | C3 | -6.8 | 1508 | <b>Chain A:</b> PHE501 GLU503 LYS504 PHE506 THR507 PHE508 HIS509 PHE567 ALA568 GLY571 PRO572 VAL575                                                             |
|            | C4 | -6.7 | 793  | <b>Chain A:</b> GLU100 LEU103 SER104 TYR147 ARG196 ILE202 GLN203 LYS204 GLU207 LYS242 CYS245 HIS246                                                             |
|            | C5 | -7.7 | 356  | <b>Chain A:</b> ASN385 LEU386 GLN389 ASN390 GLN393 LEU406 VAL408 ARG409 TYR410 ARG412 LYS413 SER488 LEU490 THR491 PRO492                                        |

**Table S10. For complex 4**

| <b>Proteins</b> | <b>Pocket ID</b> | <b>Vina Score</b> | <b>Cavity volume (Å<sup>3</sup>)</b> | <b>Interacting amino acids</b>                                                                                                                       |
|-----------------|------------------|-------------------|--------------------------------------|------------------------------------------------------------------------------------------------------------------------------------------------------|
| <b>VEGF</b>     | C1               | -6.7              | 95                                   | <b>Chain E:</b> TYR139 SER140 GLU141 PRO143 LYS171 PHE172 PRO173 LEU174 ILE202 GLY203 LEU204 THR206 LYS217 ASN219 LEU221 THR222                      |
|                 | C2               | -5.5              | 84                                   | <b>Chain E:</b> PRO163 ILE165 THR166 VAL167 THR168 LEU169 THR176 LEU177 ILE178 PRO179 ASP180 GLY181 ILE184 ILE185 TRP186 ASP187 SER188               |
|                 | C3               | -3.9              | 83                                   | <b>Chain E:</b> ARG133 THR161 SER162 ASN164 ILE165 THR166 THR210 VAL211 ASN212 GLY213                                                                |
|                 | C4               | -5.9              | 77                                   | <b>Chain E:</b> PRO163 ASN164 ILE165 THR166 VAL167 THR168 LYS170 THR176 ILE178 PRO179 TRP186 SER188 PHE192 GLU208 ALA209 THR210 LEU215               |
|                 | C5               | -5.6              | 73                                   | <b>Chain E:</b> GLU137 GLU144 ILE145 ILE146 HIS147 MET148 THR149 ARG152 GLU153 LEU154 VAL155 PRO157 ARG159 ARG189 LYS190 GLN225                      |
| <b>TGFB1</b>    | C1               | -6.2              | 126                                  | <b>Chain A:</b> LEU20 TYR21 ILE22 LYS26 ASP27 LEU28 TYR39 ALA41 ASN42 PHE43 CYS44 CYS78 VAL79 PRO80 LEU83 ASN103 MET104 ILE105 VAL106                |
|                 | C2               | -5.2              | 83                                   | <b>Chain A:</b> PHE24 ARG25 TRP30 LYS31 TRP32 ILE33 HIS34 GLU35 PRO36 LYS37 TYR91 GLY93                                                              |
|                 | C3               | -6.9              | 56                                   | <b>Chain A:</b> LYS13 ASN14 GLY46 PRO47 CYS48 PRO49 TYR50 ALA63 ASN66 GLN67 ASN69 PRO70 GLY71 ALA72 SER73 ALA74 ALA75 PRO76 CYS77 CYS78              |
|                 | C4               | -5                | 49                                   | <b>Chain A:</b> THR4 ASN5 PHE8 GLN19 PRO36 GLY38 TYR39 HIS40 ASN42 GLU84 LEU86 PRO87 ILE105 ARG107                                                   |
|                 | C5               | -5.1              | 44                                   | <b>Chain A:</b> CYS7 PHE8 SER10 THR11 GLU12 LYS13 VAL17 ARG18 GLN19 LEU20 TYR21 PHE43 LEU45 GLY46 PRO47                                              |
| <b>BRAF</b>     | C1               |                   |                                      | <b>Chain A:</b> ILE463 GLY464 SER465 VAL471 ALA481 VAL482 LYS483 GLU501 LEU514 ILE527 THR529 GLN530 TRP531 CYS532 GLU533 GLY534 SER535 SER536 TYR538 |

|            |    |      |      |                                                                                                                                                                                          |
|------------|----|------|------|------------------------------------------------------------------------------------------------------------------------------------------------------------------------------------------|
|            |    |      |      | HIS539 ALA543 ASN580 PHE583<br>ASP594 PHE595 GLY596 LEU597                                                                                                                               |
|            | C2 | -6.4 | 2121 | <b>Chain B:</b> ILE463 GLY464 SER465<br>GLY466 VAL471 ALA481 LEU514<br>THR529 GLN530 TRP531 CYS532<br>GLY534 SER535 SER536 TYR538<br>HIS539 ASN580 PHE583 PHE595<br>GLY596               |
|            | C3 | -5.1 | 1855 | <b>Chain A:</b> ASP479 TRP531 GLU533<br>HIS585 GLU586 ASP587 ASN588<br>THR589<br><b>Chain B:</b> LYS551 ASP555 ARG558<br>GLN559 ARG562 GLU586 ASN588<br>THR589                           |
|            | C4 | -6.9 | 1065 | <b>Chain A:</b> PHE468 THR491 GLN493<br>GLN494 ALA497 ASN500 GLU501<br>VAL504 ILE573 HIS574 ARG575<br>ASP576 LYS578 ASP594 GLY596<br>LEU597 ALA598 THR599 SER614<br>TYR633               |
|            | C5 | -5   | 309  | <b>Chain B:</b> LEU674 SER675 PRO676<br>ASP677 LEU678 LYS687 LYS690<br>ARG691 ALA694 GLU695 LEU697<br>LYS698 LYS699                                                                      |
| <b>P53</b> | C1 | -7.1 | 470  | <b>Chain A:</b> THR102 GLN104 PHE109<br>ARG110 LEU111 GLY112 PHE113<br>LEU114 HIS115 TYR126 PRO128<br>ALA129 ASN131 GLN144 TRP146<br>ASN268 SER269                                       |
|            | C2 | -5.3 | 215  | <b>Chain A:</b> LEU145 VAL157 GLY199<br>LEU201 ARG202 VAL218 PRO219<br>TYR220 GLU221 PRO222 PRO223<br>CYS229 THR230 THR231 ILE232                                                        |
|            | C3 | -6   | 208  | <b>Chain A:</b> LEU145 THR150 PRO151<br>PRO152 PRO153 VAL157 VAL197<br>GLU198 GLY199 LEU201 ARG202<br>VAL218 PRO219 TYR220 GLU221<br>PRO222 PRO223 CYS229 THR230<br>THR231 ILE232 HIS233 |
|            | C4 | -6.1 | 127  | <b>Chain A:</b> SER95 SER96 VAL97 PRO98<br>SER99 LYS101 TYR103 ARG158<br>MET160 LEU206 ASP208 THR211<br>ARG213 SER215 THR256 GLU258<br>SER261 GLY262 ASN263 LEU264<br>ARG267             |
|            | C5 | -4.5 | 101  | <b>Chain A:</b> TRP146 VAL147 ASP148<br>SER149 THR150 PRO151 PRO152<br>PRO153 TYR220 GLU221 PRO222<br>PRO223 GLU228                                                                      |

|            |    |       |      |                                                                                                                                                                                                                                          |
|------------|----|-------|------|------------------------------------------------------------------------------------------------------------------------------------------------------------------------------------------------------------------------------------------|
| <b>BSA</b> | C1 | -7.5  | 8389 | <b>Chain A:</b> TYR156 LYS187 THR190<br>SER191 ARG194 ARG198 TRP213<br>ARG217 GLN220 LYS221 HIS287<br>ALA290 GLU291 VAL292 GLU293<br>LYS294 PRO338 GLU339 TYR340<br>ALA341 VAL342 ARG435 LYS439<br>GLU443 PRO446 CYS447 ASP450<br>TYR451 |
|            | C2 | -10.2 | 3498 | <b>Chain A:</b> ASP108 SER109 PRO110<br>ASP111 LEU112 PRO113 LYS114<br>ARG144 HIS145 PRO146 ARG185<br>GLU186 LEU189 THR190 SER192<br>ALA193 ARG196 PRO420 GLU424<br>SER428 LYS431 ARG435 TYR451<br>LEU454 ILE455 ARG458 GLU519<br>ILE522 |
|            | C3 | -5.2  | 1508 | <b>Chain A:</b> PHE501 GLU503 LYS504<br>PHE506 THR507 HIS509 GLU564<br>PHE567 ALA568 GLY571 PRO572<br>VAL575 VAL576 GLN579                                                                                                               |
|            | C4 | -6.2  | 793  | <b>Chain A:</b> PRO96 GLU100 SER104<br>HIS105 LYS106 ASP108 TYR147<br>ARG196 ILE202 GLN203 LYS204<br>LYS242 CYS245 HIS246 GLU464<br>LYS465                                                                                               |
|            | C5 | -6.8  | 356  | <b>Chain A:</b> GLU382 PRO383 ASN385<br>LEU386 GLN389 ASN390 GLN393<br>VAL408 ARG409 ARG412 LYS413<br>ARG484 PRO485 PHE487 SER488<br>ALA489 LEU490 THR491 PRO492<br>GLU540                                                               |
